# Supplementary material for: Developing evidence-informed indicators to monitor HIV pre-exposure prophylaxis programmes across EU/EEA countries: a multi-stakeholder consensus
Source: PubMed Central journal article supplement (PMC10318945; doi:10.2807/1560-7917.es.2023.28.23.2200546), 2023-06-08
Supplement: 22-00546_VANHAMEL_Supplement.pdf [file 22-00546_VANHAMEL_Supplement.pdf]

## Supplementary materials

*This supplementary material is hosted by Eurosurveillance as supporting information alongside the article "Developing evidence-informed indicators to monitor HIV pre-exposure prophylaxis programmes across EU/EEA countries: a multi-stakeholder consensus", on behalf of the authors, who remain responsible for the accuracy and appropriateness of the content. The same standards for ethics, copyright, attributions and permissions as for the article apply. Supplements are not edited by Eurosurveillance and the journal is not responsible for the maintenance of any links or email addresses provided therein.*

### Supplementary material 1: Composition of research team and expert panel.

#### 1. Research team

| NAME                     | COUNTRY/ORGANISATION         |
|--------------------------|------------------------------|
| 1. Jef Vanhamel          | Belgium (ITM Antwerp)        |
| 2. Eline Wijstma         | Belgium (ITM Antwerp)        |
| 3. Jessika Deblonde      | Belgium (Sciensano Brussels) |
| 4. Marie Laga            | Belgium (ITM Antwerp)        |
| 5. Bea Vuylsteke         | Belgium (ITM Antwerp)        |
| 6. Christiana Nöstlinger | Belgium (ITM Antwerp)        |

#### 2. Expert panel

| NAME                              | COUNTRY/ORGANISATION |
|-----------------------------------|----------------------|
| 1. Jessika Deblonde               | Belgium              |
| 2. Josip Begovac                  | Croatia              |
| 3. Anna Kubátová                  | Czech Republic       |
| 4. Henriikki Brummer-Korvenkontio | Finland              |
| 5. Jean-Michel Molina             | France               |
| 6. Jérémy Zeggagh                 | France               |
| 7. Uwe Koppe                      | Germany              |
| 8. Binod Mahanty                  | Germany              |

|                          |                                |
|--------------------------|--------------------------------|
| 9. Daniel Schmidt        | Germany                        |
| 10. Ioannis Mameletzis   | Greece                         |
| 11. Caroline Hurley      | Ireland                        |
| 12. Fiona Lyons          | Ireland                        |
| 13. Carole Devaux        | Luxembourg                     |
| 14. Valeska Padovese     | Malta                          |
| 15. Silke David          | Netherlands                    |
| 16. Elske Hoornenborg    | Netherlands                    |
| 17. Birgit Van Benthem   | Netherlands/STI CC             |
| 18. Alma Cicic           | Montenegro                     |
| 19. Milena Stevanovikj   | North Macedonia                |
| 20. Arild Johan Myrberg  | Norway                         |
| 21. Justyna Kowalska     | Poland                         |
| 22. Milosz Parczewski    | Poland                         |
| 23. Margarida Tavares    | Portugal                       |
| 24. Claudia Estcourt     | Scotland                       |
| 25. Janez Tomažič        | Slovenia                       |
| 26. Julia Del Amo        | Spain                          |
| 27. Asuncion Diaz        | Spain                          |
| 28. Pep Coll             | Spain                          |
| 29. Finn Filen           | Sweden                         |
| 30. Benjamin Hampel      | Switzerland                    |
| 31. Natalie Messerli     | Switzerland                    |
| 32. Matthias Reinacher   | Switzerland                    |
| 33. Olga Denisiuk        | Ukraine                        |
| 34. Ann Sullivan         | EACS                           |
| 35. Antons Mozalevskis   | WHO Regional Office for Europe |
| 36. Rosalind Coleman     | UNAIDS                         |
| 37. Raj Patel            | IUSTI                          |
| 38. Andrew Winter        | IUSTI                          |
| 39. Jürgen Rockstroh     | EACS                           |
| 40. Daniela Rojas Castro | Coalition Plus                 |
| 41. Gus Cairns           | EATG                           |
| 42. Zoran Dominković     | IZORAK                         |

### 3. Steering group

| NAME                     | COUNTRY/ORGANISATION         |
|--------------------------|------------------------------|
| 1. Jef Vanhamel          | Belgium (ITM Antwerp)        |
| 2. Eline Wijstma         | Belgium (ITM Antwerp)        |
| 3. Jessika Deblonde      | Belgium (Sciensano Brussels) |
| 4. Marie Laga            | Belgium (ITM Antwerp)        |
| 5. Bea Vuylsteke         | Belgium (ITM Antwerp)        |
| 6. Christiana Nöstlinger | Belgium (ITM Antwerp)        |
| 7. Teymur Noori          | ECDC                         |
| 8. Claudia Estcourt      | IUSTI                        |
| 9. Ann Sullivan          | EACS                         |
| 10. Zoran Dominković     | IZKORAK                      |
| 11. Uwe Koppe            | Germany (RKI)                |
| 12. Silke David          | The Netherlands (RIVM)       |

### Supplementary material 2: Rapid online country survey.

| 1. UPDATE COUNTRY CASE STUDY*                                                                                                                                                                                                                                                                                        |                                                                                                                                                                                                                                                                                                                                                                                                                          |
|----------------------------------------------------------------------------------------------------------------------------------------------------------------------------------------------------------------------------------------------------------------------------------------------------------------------|--------------------------------------------------------------------------------------------------------------------------------------------------------------------------------------------------------------------------------------------------------------------------------------------------------------------------------------------------------------------------------------------------------------------------|
| <p><i>This section aims to capture the latest updates regarding the status of PrEP implementation in your country. You will find the country case study that you submitted previously <a href="#">here</a>, to assist you to fill in this section. If more options are possible, please tick all that apply.</i></p> |                                                                                                                                                                                                                                                                                                                                                                                                                          |
| A                                                                                                                                                                                                                                                                                                                    | <p><b>What is the current status of PrEP implementation in your country?</b></p> <p><input type="checkbox"/> National program with co-payments</p> <p><input type="checkbox"/> National program without co-payments</p> <p><input type="checkbox"/> Private prescription and online purchase</p> <p><input type="checkbox"/> Ongoing pilot or research project</p> <p><input type="checkbox"/> Other: please specify</p> |
|                                                                                                                                                                                                                                                                                                                      | <p><b>Are there any major changes in the main service delivery approach for PrEP [i.e. type of provider and delivery setting of PrEP], compared to the country case study? If yes, please specify. If no, please proceed to section 2.</b></p>                                                                                                                                                                           |
| B                                                                                                                                                                                                                                                                                                                    |                                                                                                                                                                                                                                                                                                                                                                                                                          |

## 2. DATA ON PrEP INITIATIONS

*In this section we will focus on available data on **people who initiate PrEP** (i.e. first-time PrEP users or ‘PrEP starters’) in your country.*

|          |                                                                                                                                                                                                                                                                                                                                                                                                                                                                                                                                                                                                                                                                                                                                                                                                                                                                                                                                                                                                                                                                                                                                               |                                                                                                                |
|----------|-----------------------------------------------------------------------------------------------------------------------------------------------------------------------------------------------------------------------------------------------------------------------------------------------------------------------------------------------------------------------------------------------------------------------------------------------------------------------------------------------------------------------------------------------------------------------------------------------------------------------------------------------------------------------------------------------------------------------------------------------------------------------------------------------------------------------------------------------------------------------------------------------------------------------------------------------------------------------------------------------------------------------------------------------------------------------------------------------------------------------------------------------|----------------------------------------------------------------------------------------------------------------|
| <b>A</b> | <p><b>How many people have started PrEP (i.e. have received PrEP for the first time in their lives) in the year 2019<sup>1</sup> in your country? Please specify how this number was produced.</b></p> <p><i>If no estimate on national level can be provided, please provide any other (more peripheral) available data on PrEP starters and specify the source(s). If no data at all are available, please proceed to question C.</i></p>                                                                                                                                                                                                                                                                                                                                                                                                                                                                                                                                                                                                                                                                                                   |                                                                                                                |
|          |                                                                                                                                                                                                                                                                                                                                                                                                                                                                                                                                                                                                                                                                                                                                                                                                                                                                                                                                                                                                                                                                                                                                               |                                                                                                                |
|          | <p><b>Please specify for each level (i.e. national/regional, and facility-level), <u>all possible available data sources</u> that you are currently aware of and that could inform the number of PrEP starters in your country. If any (ongoing) research is available that could inform this number, please specify.</b></p> <ul style="list-style-type: none"> <li>- Possible sources can include (but are not limited to): (sub-)national surveillance, clinical record data (i.e. patient data), pharmacy data (e.g. boxes of TDF/FTC sold), claims data (e.g. reimbursed prescriptions/consultations for PrEP), etc.</li> <li>- (Sub-)national or regional level concerns the availability of data covering the entire country (or county/region for sub-national level), either through central data collection systems, or through the reporting of peripherally collected data (i.e. at facility-level) to a (sub-)national focal point.</li> <li>- Facility-level concerns the availability of data at the specific facility or site where they are collected and/or registered (i.e. at pharmacy or at certain clinics).</li> </ul> |                                                                                                                |
| <b>B</b> | <b>Level (national/regional, facility) and research data</b>                                                                                                                                                                                                                                                                                                                                                                                                                                                                                                                                                                                                                                                                                                                                                                                                                                                                                                                                                                                                                                                                                  | <b>Data sources (e.g. surveillance, clinical records, pharmacy data, claims data, other?). Please specify.</b> |
|          | 1. National or regional (if applicable)                                                                                                                                                                                                                                                                                                                                                                                                                                                                                                                                                                                                                                                                                                                                                                                                                                                                                                                                                                                                                                                                                                       |                                                                                                                |
|          | 2. Facility level                                                                                                                                                                                                                                                                                                                                                                                                                                                                                                                                                                                                                                                                                                                                                                                                                                                                                                                                                                                                                                                                                                                             |                                                                                                                |
|          | 3. Research data (or ongoing research projects) Please specify.                                                                                                                                                                                                                                                                                                                                                                                                                                                                                                                                                                                                                                                                                                                                                                                                                                                                                                                                                                                                                                                                               |                                                                                                                |

<sup>1</sup> We request data on the year 2019 as data on the reporting year of 2020 might not be available yet in some settings and/or COVID-19 might have caused considerable disruptions in data collection/registration compared to regular reporting years. However, if only data outside the requested time span are available, then please provide these data and specify the reporting period.

|          |                                                                                                                                                                                                                                                                                                                        |
|----------|------------------------------------------------------------------------------------------------------------------------------------------------------------------------------------------------------------------------------------------------------------------------------------------------------------------------|
| <b>C</b> | <b>What are some of the main challenges you currently encounter with regard to monitoring the number of PrEP initiations in your country?</b> [i.e. potential for over- versus under-reporting (accuracy), possibility that certain groups or regions are not included (coverage) etc.] <b>Please explain briefly.</b> |
|          |                                                                                                                                                                                                                                                                                                                        |

|                                                                                                                                                                                                                                                                             |                       |                                                                                                    |                                                                                                    |                                                     |
|-----------------------------------------------------------------------------------------------------------------------------------------------------------------------------------------------------------------------------------------------------------------------------|-----------------------|----------------------------------------------------------------------------------------------------|----------------------------------------------------------------------------------------------------|-----------------------------------------------------|
| <b>Please indicate whether the following information on PrEP starters is – to your knowledge – available in your country? If yes, can you explain briefly (e.g. data sources, national/regional and facility-level etc.) and provide an estimate if possible/available?</b> |                       |                                                                                                    |                                                                                                    |                                                     |
| <b>Category</b>                                                                                                                                                                                                                                                             |                       | <b>Available?</b>                                                                                  | <b>Can you specify? (e.g. available data sources, facility vs. national/regional level etc.)</b>   | <b>If available, estimate for 2019<sup>1</sup>.</b> |
| Sex                                                                                                                                                                                                                                                                         |                       | <input type="checkbox"/> YES<br><input type="checkbox"/> NO<br><input type="checkbox"/> Don't know |                                                                                                    |                                                     |
| Age (group)                                                                                                                                                                                                                                                                 |                       | <input type="checkbox"/> YES<br><input type="checkbox"/> NO<br><input type="checkbox"/> Don't know |                                                                                                    |                                                     |
| Country of birth                                                                                                                                                                                                                                                            |                       | <input type="checkbox"/> YES<br><input type="checkbox"/> NO<br><input type="checkbox"/> Don't know |                                                                                                    |                                                     |
| <b>D</b>                                                                                                                                                                                                                                                                    | <b>KEY POPULATION</b> | MSM                                                                                                | <input type="checkbox"/> YES<br><input type="checkbox"/> NO<br><input type="checkbox"/> Don't know |                                                     |
|                                                                                                                                                                                                                                                                             |                       | Transgender people                                                                                 | <input type="checkbox"/> YES<br><input type="checkbox"/> NO<br><input type="checkbox"/> Don't know |                                                     |
|                                                                                                                                                                                                                                                                             |                       | Sex workers                                                                                        | <input type="checkbox"/> YES<br><input type="checkbox"/> NO<br><input type="checkbox"/> Don't know |                                                     |
|                                                                                                                                                                                                                                                                             |                       | People who inject drugs                                                                            | <input type="checkbox"/> YES<br><input type="checkbox"/> NO<br><input type="checkbox"/> Don't know |                                                     |
|                                                                                                                                                                                                                                                                             |                       | Prisoners                                                                                          | <input type="checkbox"/> YES<br><input type="checkbox"/> NO<br><input type="checkbox"/> Don't know |                                                     |

|  |                                                                                              |                                                                                                    |  |  |
|--|----------------------------------------------------------------------------------------------|----------------------------------------------------------------------------------------------------|--|--|
|  | PrEP regimen (daily versus event-driven)                                                     | <input type="checkbox"/> YES<br><input type="checkbox"/> NO<br><input type="checkbox"/> Don't know |  |  |
|  | Setting where PrEP was prescribed (e.g. HIV clinic, private practice, general hospital etc.) | <input type="checkbox"/> YES<br><input type="checkbox"/> NO<br><input type="checkbox"/> Don't know |  |  |

### 3. ADDITIONAL DATA RELATED TO PrEP

*In this section we will focus on additional PrEP data (other than 'PrEP starters') currently available in your country.*

|                                                                                                                                                                                                                  |                                                                        |                                                                                                    |                                                    |                                                     |
|------------------------------------------------------------------------------------------------------------------------------------------------------------------------------------------------------------------|------------------------------------------------------------------------|----------------------------------------------------------------------------------------------------|----------------------------------------------------|-----------------------------------------------------|
| <b>To your knowledge, are any data on the following topics related to PrEP available in your country? If yes, specify the indicator used and its data source, and provide an estimate if possible/available.</b> |                                                                        |                                                                                                    |                                                    |                                                     |
|                                                                                                                                                                                                                  | <b>Category</b>                                                        | <b>Available?</b>                                                                                  | <b>Specify (e.g. indicator used + data source)</b> | <b>If available, estimate for 2019<sup>1</sup>.</b> |
| <b>A</b>                                                                                                                                                                                                         | Number of people eligible for PrEP (e.g. per key population).          | <input type="checkbox"/> YES<br><input type="checkbox"/> NO<br><input type="checkbox"/> Don't know |                                                    |                                                     |
|                                                                                                                                                                                                                  | Number of people having received PrEP at least once.                   | <input type="checkbox"/> YES<br><input type="checkbox"/> NO<br><input type="checkbox"/> Don't know |                                                    |                                                     |
|                                                                                                                                                                                                                  | Number of people that discontinued PrEP.                               | <input type="checkbox"/> YES<br><input type="checkbox"/> NO<br><input type="checkbox"/> Don't know |                                                    |                                                     |
|                                                                                                                                                                                                                  | Number of HIV seroconversions among people previously prescribed PrEP. | <input type="checkbox"/> YES<br><input type="checkbox"/> NO<br><input type="checkbox"/> Don't know |                                                    |                                                     |
|                                                                                                                                                                                                                  | Any other relevant information on PrEP use?                            | N/A                                                                                                |                                                    |                                                     |
|                                                                                                                                                                                                                  |                                                                        |                                                                                                    |                                                    |                                                     |

### 4. FUTURE PERSPECTIVES FOR MONITORING PrEP

|                                                                                                                                                                                               |  |
|-----------------------------------------------------------------------------------------------------------------------------------------------------------------------------------------------|--|
| <b>To your knowledge, are there any (other) potential data sources that are currently unexploited/under-used in your country and that could support the monitoring of PrEP in the future?</b> |  |
| <b>A</b>                                                                                                                                                                                      |  |

|          |                                                                                                                                                                                                                   |
|----------|-------------------------------------------------------------------------------------------------------------------------------------------------------------------------------------------------------------------|
| <b>B</b> | <b>According to you, what are key priorities for improving the monitoring of PrEP in your country? (please list at least three in descending order of importance, i.e. number 1 being the most important one)</b> |
|          | 1.                                                                                                                                                                                                                |
|          | 2.<br>3.                                                                                                                                                                                                          |
| <b>C</b> | <b>What are your expectations/wishes from this project? What kind of output/tool would add the most value to you at this stage of monitoring PrEP rollout in your country?</b>                                    |
|          |                                                                                                                                                                                                                   |

| <b>5. FINAL COMMENTS</b> |                                                                                                                                                                                              |
|--------------------------|----------------------------------------------------------------------------------------------------------------------------------------------------------------------------------------------|
| <b>A</b>                 | <b>Please share below any other information, comments and/or suggestions that could be relevant regarding the topic of monitoring PrEP (either for your country or at the EU/EEA level).</b> |
|                          |                                                                                                                                                                                              |

\* This survey was sent out to representatives of 16 different EU/EEA countries: Belgium, Croatia, Czech Republic, England, France, Germany, Ireland, Malta, The Netherlands, Norway, Poland, Scotland, Slovenia, Spain, Sweden and Switzerland. We received 11 completed questionnaires, from: Belgium, Croatia, England, France, Germany, Ireland, Malta, The Netherlands, Scotland and Spain.

**Supplementary material 3: list of candidate indicators and accompanying definitions, and a list of useful data sources for PrEP monitoring.**

| Indicator name                         | Description                                                                                                                                             |
|----------------------------------------|---------------------------------------------------------------------------------------------------------------------------------------------------------|
| <b>1. PrEP service availability</b>    | The number of PrEP providers in a given area or per 100.000 population.                                                                                 |
| <b>2. PrEP awareness</b>               | The number of people who report being aware of the existence of PrEP as an HIV prevention option, regardless of whether or not it is available to them. |
| <b>3. Willingness to use PrEP</b>      | The number of people who report being willing to use PrEP if it were offered/available to them.                                                         |
| <b>4. Discussed PrEP with provider</b> | The proportion of PrEP-eligible people that discussed PrEP with a provider, e.g. requested or received information on PrEP.                             |
| <b>5. PrEP eligibility</b>             | The number of people that are (estimated to be) eligible for PrEP, according to local PrEP eligibility criteria.                                        |

|                                                     |                                                                                                                                                                                                                                                                                                                                                       |
|-----------------------------------------------------|-------------------------------------------------------------------------------------------------------------------------------------------------------------------------------------------------------------------------------------------------------------------------------------------------------------------------------------------------------|
| <b>6. Number of sexual health service attendees</b> | The number of people that attended a sexual health service (SHS) in the reporting period (e.g. 12 months).                                                                                                                                                                                                                                            |
| <b>7. Current PrEP use</b>                          | The number of people who used PrEP <b>at least once</b> during the reporting period (e.g. last 12 months).                                                                                                                                                                                                                                            |
| <b>8. New PrEP initiations</b>                      | The number of people who initiated PrEP for the first time in their lives (i.e. who were previously naïve to the use of ARVs for the purpose of HIV prevention) during the reporting period (e.g. the last 12 months).                                                                                                                                |
| <b>9. Profile of current PrEP users</b>             | The number of people who used PrEP <b>at least once</b> during the reporting period (e.g. last 12 months), disaggregated by some key characteristics of these users.<br>Disaggregations: sex, age, key population (MSM, transgender persons, PWID, sex workers, prisoners), nationality, country of birth, socio-economic status, place of residence. |
| <b>10. PrEP coverage</b>                            | The number of people who used PrEP at least once during the reporting period (e.g. 12 months), divided by the size of the total PrEP-eligible population.                                                                                                                                                                                             |
| <b>11. PrEP product use</b>                         | The number of people who used PrEP at least once during the reporting period, stratified by specific PrEP product choice (i.e. oral TDF/FTC, oral TDF/3TC, oral TDF, or – in the future – injectable Cabotegravir or oral Islatavir).                                                                                                                 |
| <b>12. PrEP dosing regimen</b>                      | The proportion of people taking PrEP on a daily versus event-driven basis during the reporting period.                                                                                                                                                                                                                                                |
| <b>13. PrEP-to-need ratio</b>                       | The number of people who used PrEP at least once during the reporting period in a given area (e.g. 12 months), divided by the number of new HIV diagnoses during the reporting period (e.g. 12 months).                                                                                                                                               |
| <b>14. Adherence</b>                                | The proportion of PrEP users with sufficient or good adherence to the chosen PrEP dosing regimen (i.e. who take pills as directed to have protective drug levels in the blood during condomless intercourse).                                                                                                                                         |
| <b>15. PrEP continuation</b>                        | The proportion of people who initiated PrEP and continued taking PrEP until a certain time point.                                                                                                                                                                                                                                                     |
| <b>16. PrEP discontinuation</b>                     | The number of people who are reported to have stopped PrEP OR who did not return for a follow-up visit during the reporting period (and who still received PrEP in the previous reporting period).                                                                                                                                                    |
| <b>17. Retention in care</b>                        | The number of HIV tests performed among all PrEP users during the reporting period (e.g. 12 months), divided by the number of HIV tests expected to have been performed among all PrEP users during the reporting period (e.g. 12 months).                                                                                                            |
| <b>18. HIV seroconversions among PrEP users</b>     | The number of new HIV diagnoses among people prescribed PrEP at least once during the reporting period and who had at least one follow-up HIV test.                                                                                                                                                                                                   |
| <b>19. PrEP safety</b>                              | The number and type of (serious) adverse events that occur among PrEP users during the reporting period and are related to PrEP use.                                                                                                                                                                                                                  |
| <b>20. STI diagnoses</b>                            | The number of new diagnoses of chlamydia, gonorrhoea and syphilis among PrEP users during the reporting period.                                                                                                                                                                                                                                       |
| <b>21. ARV resistance</b>                           | The proportion of blood specimens from PrEP users or people with a history of PrEP use and diagnosed with HIV that were tested and which show genetic mutations associated with (ineffective) PrEP use.                                                                                                                                               |



**Table 1.** List of useful data sources for monitoring programmatic PrEP indicators, as identified in this scoping review and rapid country survey.

| Data source                            | PrEP indicators that can be constructed using this data source                                                                                                                                                                                                                                                                                                                                                             | Reported Benefits                                                                                                                                                                                                         | Reported Challenges                                                                                         | Comments                                                                                      |
|----------------------------------------|----------------------------------------------------------------------------------------------------------------------------------------------------------------------------------------------------------------------------------------------------------------------------------------------------------------------------------------------------------------------------------------------------------------------------|---------------------------------------------------------------------------------------------------------------------------------------------------------------------------------------------------------------------------|-------------------------------------------------------------------------------------------------------------|-----------------------------------------------------------------------------------------------|
| <b>Pharmacy prescription database</b>  | Number of PrEP users;<br>Number of PrEP initiations (if UICs available);                                                                                                                                                                                                                                                                                                                                                   | 1) Algorithms applied to the specified databases can identify TDF/FTC prescriptions for PrEP with high sensitivity and high specificity (after excluding indications for HIV infection, HBV infection or TDF/FTC for PEP) | 1) Databases not exhaustive (e.g., unavailability of data from prescriptions through closed health systems) | Provides estimates on prescriptions <i>written</i>                                            |
| <b>Pharmacy dispensation database</b>  | PrEP continuation (if UICs available);<br>PrEP adherence as the proportion of days covered by a prescription (if UICs available);                                                                                                                                                                                                                                                                                          |                                                                                                                                                                                                                           | 2) Possible lack of insight into the proportion of missing data or whether missingness is differential      | Provides estimates on prescriptions <i>filled</i>                                             |
| <b>Medical claims database</b>         | Number of PrEP users;<br>Number of PrEP initiations (if UICs available);<br>PrEP continuation (if UICs available);<br>Retention in PrEP services (i.e. through HIV testing as proxy measure);<br>HIV infection (e.g., through HIV testing followed by ART prescription)<br>PrEP adherence as the proportion of days covered by a prescription (if UICs available);                                                         | 2) Readily available data<br><br>3) Population-level data                                                                                                                                                                 | 3) Limited sociodemographic data (e.g., on sex, age and place of residence, but not KP)                     | Provides estimates on prescriptions <i>filled</i>                                             |
| <b>PrEP facility/clinic registries</b> | PrEP need (i.e. proportion of clinic attendants who report behaviour consistent with PrEP-eligibility)<br>Number of PrEP initiations;<br>Number of PrEP users;<br>Sociodemographic data (including KP)<br>Dosing regimen;<br>PrEP adherence, as self-reported or as the proportion of days covered by a prescription;<br>Continuation;<br>Discontinuation and reasons;<br>Retention in PrEP services;<br>New STI diagnoses | 1) Not approximations, but records.<br><br>2) Data can be kept at the client-level                                                                                                                                        | 1) Incomplete data if administrative burden on facility staff is high                                       | Using standardized service codes facilitates aggregation of local data for national estimates |

|                                  |                                                                                                                                                                                                                                                                                                                                                                                                                                                                                                               |                                                                                                                                           |                                                                                                                                                                                                                                                                                                                                                           |                                                                                                                                                                                                                                                                                                                                                      |
|----------------------------------|---------------------------------------------------------------------------------------------------------------------------------------------------------------------------------------------------------------------------------------------------------------------------------------------------------------------------------------------------------------------------------------------------------------------------------------------------------------------------------------------------------------|-------------------------------------------------------------------------------------------------------------------------------------------|-----------------------------------------------------------------------------------------------------------------------------------------------------------------------------------------------------------------------------------------------------------------------------------------------------------------------------------------------------------|------------------------------------------------------------------------------------------------------------------------------------------------------------------------------------------------------------------------------------------------------------------------------------------------------------------------------------------------------|
| <b>National HIV surveillance</b> | New HIV diagnoses among total population;<br>New HIV diagnoses among PrEP users (if data can be linked to PrEP databases)<br>Proxy for PrEP need (i.e. denominator for PrEP-to-need ratio)                                                                                                                                                                                                                                                                                                                    | 1) Population-level data                                                                                                                  | 1) Limited sociodemographic characteristics<br><br>2) Unique identifier codes are needed to link HIV diagnoses to PrEP use.                                                                                                                                                                                                                               | /                                                                                                                                                                                                                                                                                                                                                    |
| <b>Repeated surveys</b>          | PrEP awareness;<br>Willingness to use PrEP;<br>PrEP need (i.e. proportion of respondents who report behaviour consistent with PrEP eligibility);<br>Estimates of PrEP use prevalence (among respondents);<br>Trends in the profile of PrEP users (although surveys likely target only 1 KP);<br>Estimates of dosing regimen;<br>Estimates of adherence;<br>Estimates of continuation;<br>Estimates of discontinuation and reasons;<br>Changes in behaviour after PrEP initiation;<br>Trends in STI diagnoses; | 1) Survey questions are adaptable to local contexts<br><br>2) Behaviour, knowledge and attitudes cannot be captured by other data sources | 1) Surveys likely comprise convenience samples, and results may consequently not be generalizable to the total population<br><br>2) Self-reported outcomes are susceptible to information bias, including recall bias and social desirability bias<br><br>3) Financial and human resources are required to disseminate, (administer), and analyze surveys | To date, large-scale behavioural surveys to monitor PrEP have focused on MSM.<br><br>Different sampling methods (e.g., venue-based or internet-based) may yield characteristically different population samples.<br><br>Generally, internet-based surveys are more timely and lower cost than in-person surveys and have a broader geographic scope. |

## Supplementary material 4: methodological details of the Delphi process.

### 1. The Delphi technique

In order to facilitate the process of ultimately finding the most reliable consensus on indicators suitable to include in a practical monitoring tool for PrEP programmes in the EU/EEA, we used a modified Delphi method as an overall guiding approach<sup>2</sup>. The Delphi technique has been characterized as “*a method for structuring a group communication process so that the process is effective in allowing a group of individuals, as a whole, to deal with a complex problem*”<sup>3</sup>. Key advantages of using the technique are (1) the ability to build consensus in areas where scientific evidence is insufficient and/or conflicting, (2) the possibility to involve a wide range of experts from many countries at distance, with their indirect interaction being mediated by the study team, and (3) the ability to ‘level-out’ the influence of relatively dominant voices when using regular discussion groups. The modified Delphi method applied in this project existed of two phases, and combined a comprehensive review of existing evidence on the topic of PrEP monitoring (phase 1) with the collective judgement of a multidisciplinary expert panel (phase 2).

To this extent, an international expert panel was established with support of ECDC, consisting of 42 members. This panel included people from different backgrounds (clinical, research, and community), yet all with practice-based experience with the implementation and/or monitoring of PrEP or related programmes, and representing different EU/EEA Member States (see supplementary material 1 for the full list of experts). This expert panel committed to participating to the entire consensus-building process.

### 2. Consensus-building process

The data collection phase consisted of two online survey rounds, with an online meeting of the expert panel in-between survey rounds. Data collection took place between September and November 2021. We used Formsite as online survey platform, and Webex as online videoconference tool. The first Delphi survey was conducted in September 2021 and consisted of the 21 candidate indicators identified through the evidence review phase. Expert panelists were asked to rate the perceived importance and feasibility of implementing the candidate indicators in their respective contexts on a 7-point Likert scale (1=not important or not feasible at all; 7=very important or very feasible). Experts were asked to base their ratings on the accompanying evidence summary tables (see [Table 1](#) and [Table 2](#)), combined with their personal opinion and experience. Participating experts had the opportunity to provide additional qualitative comments for each indicator, to clarify their ratings or to express particular concerns they might have had. A link to the online survey can be found [here](#).

In total, 30 out of 42 invited experts completed the first online survey. For each candidate indicator, we calculated the experts’ median rating for importance and feasibility, and the percentage of experts rating on either extremes of the scale (i.e. 6-7 as top rating, and 1-3 as bottom rating).

Based on the ratings of the experts, the research team categorized the candidate indicators into their likelihood of being included in a future monitoring tool. The following algorithm was used to distinguish between indicators that could be (1) included without further discussion, (2) for which inclusion was uncertain, or (3) indicators that would be eligible for exclusion due to poor ratings of importance and feasibility:

---

<sup>2</sup> McCorry NK, O’Connor S, Leemans K, et al. Quality indicators for Palliative Day Services: A modified Delphi study. *Palliative Medicine*. 2019;33(2):197-205. doi:10.1177/0269216318810601.

<sup>3</sup> Chitu Okoli, Suzanne D. Pawlowski. The Delphi method as a research tool: an example, design considerations and applications. *Information & Management*. 2004; 42 (1) : 15-29. doi.org/10.1016/j.im.2003.11.002.

- INCLUDE WITH NO DISCUSSION: Median importance rating of 6-7 with NO DISAGREEMENT
  - Disagreement = 25% or more experts rated 1-3 on importance scale OR expressed substantial reservations in the qualitative comments
- UNCERTAIN: Median importance rating of 3-5 (regardless of agreement) OR median importance rating of 6-7 WITH DISAGREEMENT
  - Disagreement = 25% or more experts rated 1-3 on importance scale OR expressed substantial reservations in qualitative comments
- EXCLUDE: median importance rating of 1-2 (regardless of agreement) OR indicators from uncertain category that remain unresolved after discussion

The online meeting with the expert panel was held on 9 November 2021. The aim of the meeting was to:

1. Agree to include those indicators in the monitoring tool that have a high median score of importance (6-7) with no disagreement.
2. Agree to discard indicators deemed of insufficient importance (median importance score of 1-2).
3. Discuss the appropriateness of including those indicators in the monitoring tool that fall under the 'uncertainty' category.
4. Discuss which indicators could be part of a minimum common 'core set' of indicators to be collected and reported across the EU/EEA.

After plenary discussion, during which indicators were refined to make them more accurate and adapted to the EU context, attending panellists were asked to vote for final inclusion or exclusion of the (refined) indicator in the monitoring tool, distinguishing between inclusion in a common 'core set' to be reported across EU/EEA MSs and relevant indicators to adapt on a country-level basis. The cut-off to include indicators in the final tool was set as follows:

- INCLUDE: if 75% or more of panellists voted for either inclusion or inclusion of a modified indicator (and provided suggestions for modification).
- EXCLUDE: if >25% of panellists votes for exclusion of indicator.

See supplementary material 4 for a synthesis of expert panellists' ratings.

Pending issues were resolved in a steering group consisting of the research team, the ECDC coordinator and 5 expert panellists (see Supplementary Material 1). These panellists were selected based on their particular expertise with designing programmatic PrEP monitoring indicators (i.e. one expert led a previous publication on the topic), the status of PrEP implementation and monitoring in the country (including both representation from countries more advanced in PrEP monitoring as well as "starters"), and representation from different professional backgrounds (clinical, public health

surveillance, and civil society) in addition to those of the research team (epidemiological, social sciences and M&E).

## Supplementary material 5: synthesis of the expert panel's ratings for both Delphi survey rounds.

| Indicator name                 | Description                                                                                                                                                                                                             | Number of panellists who rated the <i>importance</i> of monitoring the specified indicator as 1 to 7, during the <u>first</u> Delphi survey<br><br>1=not at all important; 7=extremely important<br>Median score is indicated by the red bar<br><br>(N of participating panellists = 30)                                                                                                                 | Percentage of panellists who voted to include or exclude the specified indicator in a monitoring tool, during the <u>second</u> Delphi survey ( <i>after plenary discussion</i> )<br><br>(N of participating panellists = 31) |                                                                           |   |   |   |   |   |   |   |   |   |   |   |    |   |    |     |                                                                                                                                                                                                                                                    |                    |        |                            |        |         |       |
|--------------------------------|-------------------------------------------------------------------------------------------------------------------------------------------------------------------------------------------------------------------------|----------------------------------------------------------------------------------------------------------------------------------------------------------------------------------------------------------------------------------------------------------------------------------------------------------------------------------------------------------------------------------------------------------|-------------------------------------------------------------------------------------------------------------------------------------------------------------------------------------------------------------------------------|---------------------------------------------------------------------------|---|---|---|---|---|---|---|---|---|---|---|----|---|----|-----|----------------------------------------------------------------------------------------------------------------------------------------------------------------------------------------------------------------------------------------------------|--------------------|--------|----------------------------|--------|---------|-------|
|                                |                                                                                                                                                                                                                         |                                                                                                                                                                                                                                                                                                                                                                                                          | As supplementary indicator<br>(= implementation up to individual EU/EEA MSs)                                                                                                                                                  | As core indicator<br>(= to be collected systematically by all EU/EEA MSs) |   |   |   |   |   |   |   |   |   |   |   |    |   |    |     |                                                                                                                                                                                                                                                    |                    |        |                            |        |         |       |
| <b>1. Current PrEP use</b>     | The number of people who used PrEP at <b>least once</b> during the reporting period (e.g. last 12 months)                                                                                                               | <table border="1"> <caption>Importance ratings for Current PrEP use</caption> <thead> <tr> <th>Rating</th> <th>Number of panellists</th> </tr> </thead> <tbody> <tr><td>1</td><td>0</td></tr> <tr><td>2</td><td>0</td></tr> <tr><td>3</td><td>0</td></tr> <tr><td>4</td><td>0</td></tr> <tr><td>5</td><td>1</td></tr> <tr><td>6</td><td>11</td></tr> <tr><td>7</td><td>18</td></tr> </tbody> </table>    | Rating                                                                                                                                                                                                                        | Number of panellists                                                      | 1 | 0 | 2 | 0 | 3 | 0 | 4 | 0 | 5 | 1 | 6 | 11 | 7 | 18 | N/A | <table border="1"> <tbody> <tr> <td>Include as defined</td> <td>82.6 %</td> </tr> <tr> <td>Include modified indicator</td> <td>17.4 %</td> </tr> <tr> <td>Exclude</td> <td>0.0 %</td> </tr> </tbody> </table> Outcome: retained as core indicator. | Include as defined | 82.6 % | Include modified indicator | 17.4 % | Exclude | 0.0 % |
| Rating                         | Number of panellists                                                                                                                                                                                                    |                                                                                                                                                                                                                                                                                                                                                                                                          |                                                                                                                                                                                                                               |                                                                           |   |   |   |   |   |   |   |   |   |   |   |    |   |    |     |                                                                                                                                                                                                                                                    |                    |        |                            |        |         |       |
| 1                              | 0                                                                                                                                                                                                                       |                                                                                                                                                                                                                                                                                                                                                                                                          |                                                                                                                                                                                                                               |                                                                           |   |   |   |   |   |   |   |   |   |   |   |    |   |    |     |                                                                                                                                                                                                                                                    |                    |        |                            |        |         |       |
| 2                              | 0                                                                                                                                                                                                                       |                                                                                                                                                                                                                                                                                                                                                                                                          |                                                                                                                                                                                                                               |                                                                           |   |   |   |   |   |   |   |   |   |   |   |    |   |    |     |                                                                                                                                                                                                                                                    |                    |        |                            |        |         |       |
| 3                              | 0                                                                                                                                                                                                                       |                                                                                                                                                                                                                                                                                                                                                                                                          |                                                                                                                                                                                                                               |                                                                           |   |   |   |   |   |   |   |   |   |   |   |    |   |    |     |                                                                                                                                                                                                                                                    |                    |        |                            |        |         |       |
| 4                              | 0                                                                                                                                                                                                                       |                                                                                                                                                                                                                                                                                                                                                                                                          |                                                                                                                                                                                                                               |                                                                           |   |   |   |   |   |   |   |   |   |   |   |    |   |    |     |                                                                                                                                                                                                                                                    |                    |        |                            |        |         |       |
| 5                              | 1                                                                                                                                                                                                                       |                                                                                                                                                                                                                                                                                                                                                                                                          |                                                                                                                                                                                                                               |                                                                           |   |   |   |   |   |   |   |   |   |   |   |    |   |    |     |                                                                                                                                                                                                                                                    |                    |        |                            |        |         |       |
| 6                              | 11                                                                                                                                                                                                                      |                                                                                                                                                                                                                                                                                                                                                                                                          |                                                                                                                                                                                                                               |                                                                           |   |   |   |   |   |   |   |   |   |   |   |    |   |    |     |                                                                                                                                                                                                                                                    |                    |        |                            |        |         |       |
| 7                              | 18                                                                                                                                                                                                                      |                                                                                                                                                                                                                                                                                                                                                                                                          |                                                                                                                                                                                                                               |                                                                           |   |   |   |   |   |   |   |   |   |   |   |    |   |    |     |                                                                                                                                                                                                                                                    |                    |        |                            |        |         |       |
| Include as defined             | 82.6 %                                                                                                                                                                                                                  |                                                                                                                                                                                                                                                                                                                                                                                                          |                                                                                                                                                                                                                               |                                                                           |   |   |   |   |   |   |   |   |   |   |   |    |   |    |     |                                                                                                                                                                                                                                                    |                    |        |                            |        |         |       |
| Include modified indicator     | 17.4 %                                                                                                                                                                                                                  |                                                                                                                                                                                                                                                                                                                                                                                                          |                                                                                                                                                                                                                               |                                                                           |   |   |   |   |   |   |   |   |   |   |   |    |   |    |     |                                                                                                                                                                                                                                                    |                    |        |                            |        |         |       |
| Exclude                        | 0.0 %                                                                                                                                                                                                                   |                                                                                                                                                                                                                                                                                                                                                                                                          |                                                                                                                                                                                                                               |                                                                           |   |   |   |   |   |   |   |   |   |   |   |    |   |    |     |                                                                                                                                                                                                                                                    |                    |        |                            |        |         |       |
| <b>2. New PrEP initiations</b> | The number of people who initiated PrEP for the first time in their lives (i.e., who were previously naïve to the use of ARVs for the purpose of HIV prevention) during the reporting period (e.g. the last 12 months). | <table border="1"> <caption>Importance ratings for New PrEP initiations</caption> <thead> <tr> <th>Rating</th> <th>Number of panellists</th> </tr> </thead> <tbody> <tr><td>1</td><td>0</td></tr> <tr><td>2</td><td>0</td></tr> <tr><td>3</td><td>1</td></tr> <tr><td>4</td><td>2</td></tr> <tr><td>5</td><td>3</td></tr> <tr><td>6</td><td>7</td></tr> <tr><td>7</td><td>16</td></tr> </tbody> </table> | Rating                                                                                                                                                                                                                        | Number of panellists                                                      | 1 | 0 | 2 | 0 | 3 | 1 | 4 | 2 | 5 | 3 | 6 | 7  | 7 | 16 | N/A | <table border="1"> <tbody> <tr> <td>Include as defined</td> <td>87.5 %</td> </tr> <tr> <td>Include modified indicator</td> <td>8.3 %</td> </tr> <tr> <td>Exclude</td> <td>4.2 %</td> </tr> </tbody> </table> Outcome: retained as core indicator.  | Include as defined | 87.5 % | Include modified indicator | 8.3 %  | Exclude | 4.2 % |
| Rating                         | Number of panellists                                                                                                                                                                                                    |                                                                                                                                                                                                                                                                                                                                                                                                          |                                                                                                                                                                                                                               |                                                                           |   |   |   |   |   |   |   |   |   |   |   |    |   |    |     |                                                                                                                                                                                                                                                    |                    |        |                            |        |         |       |
| 1                              | 0                                                                                                                                                                                                                       |                                                                                                                                                                                                                                                                                                                                                                                                          |                                                                                                                                                                                                                               |                                                                           |   |   |   |   |   |   |   |   |   |   |   |    |   |    |     |                                                                                                                                                                                                                                                    |                    |        |                            |        |         |       |
| 2                              | 0                                                                                                                                                                                                                       |                                                                                                                                                                                                                                                                                                                                                                                                          |                                                                                                                                                                                                                               |                                                                           |   |   |   |   |   |   |   |   |   |   |   |    |   |    |     |                                                                                                                                                                                                                                                    |                    |        |                            |        |         |       |
| 3                              | 1                                                                                                                                                                                                                       |                                                                                                                                                                                                                                                                                                                                                                                                          |                                                                                                                                                                                                                               |                                                                           |   |   |   |   |   |   |   |   |   |   |   |    |   |    |     |                                                                                                                                                                                                                                                    |                    |        |                            |        |         |       |
| 4                              | 2                                                                                                                                                                                                                       |                                                                                                                                                                                                                                                                                                                                                                                                          |                                                                                                                                                                                                                               |                                                                           |   |   |   |   |   |   |   |   |   |   |   |    |   |    |     |                                                                                                                                                                                                                                                    |                    |        |                            |        |         |       |
| 5                              | 3                                                                                                                                                                                                                       |                                                                                                                                                                                                                                                                                                                                                                                                          |                                                                                                                                                                                                                               |                                                                           |   |   |   |   |   |   |   |   |   |   |   |    |   |    |     |                                                                                                                                                                                                                                                    |                    |        |                            |        |         |       |
| 6                              | 7                                                                                                                                                                                                                       |                                                                                                                                                                                                                                                                                                                                                                                                          |                                                                                                                                                                                                                               |                                                                           |   |   |   |   |   |   |   |   |   |   |   |    |   |    |     |                                                                                                                                                                                                                                                    |                    |        |                            |        |         |       |
| 7                              | 16                                                                                                                                                                                                                      |                                                                                                                                                                                                                                                                                                                                                                                                          |                                                                                                                                                                                                                               |                                                                           |   |   |   |   |   |   |   |   |   |   |   |    |   |    |     |                                                                                                                                                                                                                                                    |                    |        |                            |        |         |       |
| Include as defined             | 87.5 %                                                                                                                                                                                                                  |                                                                                                                                                                                                                                                                                                                                                                                                          |                                                                                                                                                                                                                               |                                                                           |   |   |   |   |   |   |   |   |   |   |   |    |   |    |     |                                                                                                                                                                                                                                                    |                    |        |                            |        |         |       |
| Include modified indicator     | 8.3 %                                                                                                                                                                                                                   |                                                                                                                                                                                                                                                                                                                                                                                                          |                                                                                                                                                                                                                               |                                                                           |   |   |   |   |   |   |   |   |   |   |   |    |   |    |     |                                                                                                                                                                                                                                                    |                    |        |                            |        |         |       |
| Exclude                        | 4.2 %                                                                                                                                                                                                                   |                                                                                                                                                                                                                                                                                                                                                                                                          |                                                                                                                                                                                                                               |                                                                           |   |   |   |   |   |   |   |   |   |   |   |    |   |    |     |                                                                                                                                                                                                                                                    |                    |        |                            |        |         |       |

| <p><b>3. PrEP product use</b></p>                          | <p>The number of people who used PrEP at least once during the reporting period, stratified by specific PrEP product choice (i.e. oral TDF/FTC, oral TDF/3TC, oral TDF, or – in the future – injectable Cabotegravir or oral Islatavir).</p> | <table border="1"> <thead> <tr> <th>Product Choice</th> <th>Number of People</th> </tr> </thead> <tbody> <tr><td>1</td><td>2</td></tr> <tr><td>2</td><td>0</td></tr> <tr><td>3</td><td>2</td></tr> <tr><td>4</td><td>6</td></tr> <tr><td>5</td><td>5</td></tr> <tr><td>6</td><td>9</td></tr> <tr><td>7</td><td>5</td></tr> </tbody> </table>      | Product Choice      | Number of People | 1 | 2 | 2 | 0 | 3 | 2 | 4 | 6 | 5 | 5 | 6 | 9  | 7 | 5 | <table border="1"> <tr> <td>Include as defined</td> <td>52.0 %</td> </tr> <tr> <td>Include modified* indicator</td> <td>20.0 %</td> </tr> <tr> <td>Exclude</td> <td>28.0 %</td> </tr> </table> <p>*Only if relevant in the specific context (i.e., if multiple PrEP products are available)</p> <p>Outcome: excluded as separate indicator; PrEP product added as relevant disaggregator for PrEP use (i.e. PrEP use by product).</p>                                                   | Include as defined | 52.0 % | Include modified* indicator | 20.0 % | Exclude | 28.0 % | <p>N/A</p> |
|------------------------------------------------------------|----------------------------------------------------------------------------------------------------------------------------------------------------------------------------------------------------------------------------------------------|---------------------------------------------------------------------------------------------------------------------------------------------------------------------------------------------------------------------------------------------------------------------------------------------------------------------------------------------------|---------------------|------------------|---|---|---|---|---|---|---|---|---|---|---|----|---|---|-----------------------------------------------------------------------------------------------------------------------------------------------------------------------------------------------------------------------------------------------------------------------------------------------------------------------------------------------------------------------------------------------------------------------------------------------------------------------------------------|--------------------|--------|-----------------------------|--------|---------|--------|------------|
| Product Choice                                             | Number of People                                                                                                                                                                                                                             |                                                                                                                                                                                                                                                                                                                                                   |                     |                  |   |   |   |   |   |   |   |   |   |   |   |    |   |   |                                                                                                                                                                                                                                                                                                                                                                                                                                                                                         |                    |        |                             |        |         |        |            |
| 1                                                          | 2                                                                                                                                                                                                                                            |                                                                                                                                                                                                                                                                                                                                                   |                     |                  |   |   |   |   |   |   |   |   |   |   |   |    |   |   |                                                                                                                                                                                                                                                                                                                                                                                                                                                                                         |                    |        |                             |        |         |        |            |
| 2                                                          | 0                                                                                                                                                                                                                                            |                                                                                                                                                                                                                                                                                                                                                   |                     |                  |   |   |   |   |   |   |   |   |   |   |   |    |   |   |                                                                                                                                                                                                                                                                                                                                                                                                                                                                                         |                    |        |                             |        |         |        |            |
| 3                                                          | 2                                                                                                                                                                                                                                            |                                                                                                                                                                                                                                                                                                                                                   |                     |                  |   |   |   |   |   |   |   |   |   |   |   |    |   |   |                                                                                                                                                                                                                                                                                                                                                                                                                                                                                         |                    |        |                             |        |         |        |            |
| 4                                                          | 6                                                                                                                                                                                                                                            |                                                                                                                                                                                                                                                                                                                                                   |                     |                  |   |   |   |   |   |   |   |   |   |   |   |    |   |   |                                                                                                                                                                                                                                                                                                                                                                                                                                                                                         |                    |        |                             |        |         |        |            |
| 5                                                          | 5                                                                                                                                                                                                                                            |                                                                                                                                                                                                                                                                                                                                                   |                     |                  |   |   |   |   |   |   |   |   |   |   |   |    |   |   |                                                                                                                                                                                                                                                                                                                                                                                                                                                                                         |                    |        |                             |        |         |        |            |
| 6                                                          | 9                                                                                                                                                                                                                                            |                                                                                                                                                                                                                                                                                                                                                   |                     |                  |   |   |   |   |   |   |   |   |   |   |   |    |   |   |                                                                                                                                                                                                                                                                                                                                                                                                                                                                                         |                    |        |                             |        |         |        |            |
| 7                                                          | 5                                                                                                                                                                                                                                            |                                                                                                                                                                                                                                                                                                                                                   |                     |                  |   |   |   |   |   |   |   |   |   |   |   |    |   |   |                                                                                                                                                                                                                                                                                                                                                                                                                                                                                         |                    |        |                             |        |         |        |            |
| Include as defined                                         | 52.0 %                                                                                                                                                                                                                                       |                                                                                                                                                                                                                                                                                                                                                   |                     |                  |   |   |   |   |   |   |   |   |   |   |   |    |   |   |                                                                                                                                                                                                                                                                                                                                                                                                                                                                                         |                    |        |                             |        |         |        |            |
| Include modified* indicator                                | 20.0 %                                                                                                                                                                                                                                       |                                                                                                                                                                                                                                                                                                                                                   |                     |                  |   |   |   |   |   |   |   |   |   |   |   |    |   |   |                                                                                                                                                                                                                                                                                                                                                                                                                                                                                         |                    |        |                             |        |         |        |            |
| Exclude                                                    | 28.0 %                                                                                                                                                                                                                                       |                                                                                                                                                                                                                                                                                                                                                   |                     |                  |   |   |   |   |   |   |   |   |   |   |   |    |   |   |                                                                                                                                                                                                                                                                                                                                                                                                                                                                                         |                    |        |                             |        |         |        |            |
| <p><b>4. PrEP dosing regimen</b></p>                       | <p>The proportion of people taking PrEP on a daily versus event-driven basis during the reporting period.</p>                                                                                                                                | <table border="1"> <thead> <tr> <th>Dosing Regimen</th> <th>Proportion</th> </tr> </thead> <tbody> <tr><td>1</td><td>1</td></tr> <tr><td>2</td><td>0</td></tr> <tr><td>3</td><td>1</td></tr> <tr><td>4</td><td>5</td></tr> <tr><td>5</td><td>6</td></tr> <tr><td>6</td><td>11</td></tr> <tr><td>7</td><td>6</td></tr> </tbody> </table>           | Dosing Regimen      | Proportion       | 1 | 1 | 2 | 0 | 3 | 1 | 4 | 5 | 5 | 6 | 6 | 11 | 7 | 6 | <table border="1"> <tr> <td>Include as defined</td> <td>37.0 %</td> </tr> <tr> <td>Include modified* indicator</td> <td>33.3 %</td> </tr> <tr> <td>Exclude</td> <td>29.6 %</td> </tr> </table> <p>*The proportion of people taking PrEP on a daily versus <i>non-daily</i> basis during the reporting period.</p> <p>Outcome: excluded as separate indicator; dosing regimen added as relevant disaggregator for PrEP use at start (i.e. chosen PrEP dosing regimen at initiation).</p> | Include as defined | 37.0 % | Include modified* indicator | 33.3 % | Exclude | 29.6 % | <p>N/A</p> |
| Dosing Regimen                                             | Proportion                                                                                                                                                                                                                                   |                                                                                                                                                                                                                                                                                                                                                   |                     |                  |   |   |   |   |   |   |   |   |   |   |   |    |   |   |                                                                                                                                                                                                                                                                                                                                                                                                                                                                                         |                    |        |                             |        |         |        |            |
| 1                                                          | 1                                                                                                                                                                                                                                            |                                                                                                                                                                                                                                                                                                                                                   |                     |                  |   |   |   |   |   |   |   |   |   |   |   |    |   |   |                                                                                                                                                                                                                                                                                                                                                                                                                                                                                         |                    |        |                             |        |         |        |            |
| 2                                                          | 0                                                                                                                                                                                                                                            |                                                                                                                                                                                                                                                                                                                                                   |                     |                  |   |   |   |   |   |   |   |   |   |   |   |    |   |   |                                                                                                                                                                                                                                                                                                                                                                                                                                                                                         |                    |        |                             |        |         |        |            |
| 3                                                          | 1                                                                                                                                                                                                                                            |                                                                                                                                                                                                                                                                                                                                                   |                     |                  |   |   |   |   |   |   |   |   |   |   |   |    |   |   |                                                                                                                                                                                                                                                                                                                                                                                                                                                                                         |                    |        |                             |        |         |        |            |
| 4                                                          | 5                                                                                                                                                                                                                                            |                                                                                                                                                                                                                                                                                                                                                   |                     |                  |   |   |   |   |   |   |   |   |   |   |   |    |   |   |                                                                                                                                                                                                                                                                                                                                                                                                                                                                                         |                    |        |                             |        |         |        |            |
| 5                                                          | 6                                                                                                                                                                                                                                            |                                                                                                                                                                                                                                                                                                                                                   |                     |                  |   |   |   |   |   |   |   |   |   |   |   |    |   |   |                                                                                                                                                                                                                                                                                                                                                                                                                                                                                         |                    |        |                             |        |         |        |            |
| 6                                                          | 11                                                                                                                                                                                                                                           |                                                                                                                                                                                                                                                                                                                                                   |                     |                  |   |   |   |   |   |   |   |   |   |   |   |    |   |   |                                                                                                                                                                                                                                                                                                                                                                                                                                                                                         |                    |        |                             |        |         |        |            |
| 7                                                          | 6                                                                                                                                                                                                                                            |                                                                                                                                                                                                                                                                                                                                                   |                     |                  |   |   |   |   |   |   |   |   |   |   |   |    |   |   |                                                                                                                                                                                                                                                                                                                                                                                                                                                                                         |                    |        |                             |        |         |        |            |
| Include as defined                                         | 37.0 %                                                                                                                                                                                                                                       |                                                                                                                                                                                                                                                                                                                                                   |                     |                  |   |   |   |   |   |   |   |   |   |   |   |    |   |   |                                                                                                                                                                                                                                                                                                                                                                                                                                                                                         |                    |        |                             |        |         |        |            |
| Include modified* indicator                                | 33.3 %                                                                                                                                                                                                                                       |                                                                                                                                                                                                                                                                                                                                                   |                     |                  |   |   |   |   |   |   |   |   |   |   |   |    |   |   |                                                                                                                                                                                                                                                                                                                                                                                                                                                                                         |                    |        |                             |        |         |        |            |
| Exclude                                                    | 29.6 %                                                                                                                                                                                                                                       |                                                                                                                                                                                                                                                                                                                                                   |                     |                  |   |   |   |   |   |   |   |   |   |   |   |    |   |   |                                                                                                                                                                                                                                                                                                                                                                                                                                                                                         |                    |        |                             |        |         |        |            |
| <p><b>5. Number of sexual health service attendees</b></p> | <p>The number of people that attended a sexual health service (SHS) in the reporting period (e.g. 12 months)</p>                                                                                                                             | <table border="1"> <thead> <tr> <th>Number of Attendees</th> <th>Number of People</th> </tr> </thead> <tbody> <tr><td>1</td><td>3</td></tr> <tr><td>2</td><td>4</td></tr> <tr><td>3</td><td>5</td></tr> <tr><td>4</td><td>3</td></tr> <tr><td>5</td><td>4</td></tr> <tr><td>6</td><td>5</td></tr> <tr><td>7</td><td>6</td></tr> </tbody> </table> | Number of Attendees | Number of People | 1 | 3 | 2 | 4 | 3 | 5 | 4 | 3 | 5 | 4 | 6 | 5  | 7 | 6 | <p>Outcome: Excluded as separate indicator; not discussed during Delphi session 2 – specified proxy for PrEP need perceived to be unsuitable in many (non-UK) contexts</p>                                                                                                                                                                                                                                                                                                              |                    |        |                             |        |         |        |            |
| Number of Attendees                                        | Number of People                                                                                                                                                                                                                             |                                                                                                                                                                                                                                                                                                                                                   |                     |                  |   |   |   |   |   |   |   |   |   |   |   |    |   |   |                                                                                                                                                                                                                                                                                                                                                                                                                                                                                         |                    |        |                             |        |         |        |            |
| 1                                                          | 3                                                                                                                                                                                                                                            |                                                                                                                                                                                                                                                                                                                                                   |                     |                  |   |   |   |   |   |   |   |   |   |   |   |    |   |   |                                                                                                                                                                                                                                                                                                                                                                                                                                                                                         |                    |        |                             |        |         |        |            |
| 2                                                          | 4                                                                                                                                                                                                                                            |                                                                                                                                                                                                                                                                                                                                                   |                     |                  |   |   |   |   |   |   |   |   |   |   |   |    |   |   |                                                                                                                                                                                                                                                                                                                                                                                                                                                                                         |                    |        |                             |        |         |        |            |
| 3                                                          | 5                                                                                                                                                                                                                                            |                                                                                                                                                                                                                                                                                                                                                   |                     |                  |   |   |   |   |   |   |   |   |   |   |   |    |   |   |                                                                                                                                                                                                                                                                                                                                                                                                                                                                                         |                    |        |                             |        |         |        |            |
| 4                                                          | 3                                                                                                                                                                                                                                            |                                                                                                                                                                                                                                                                                                                                                   |                     |                  |   |   |   |   |   |   |   |   |   |   |   |    |   |   |                                                                                                                                                                                                                                                                                                                                                                                                                                                                                         |                    |        |                             |        |         |        |            |
| 5                                                          | 4                                                                                                                                                                                                                                            |                                                                                                                                                                                                                                                                                                                                                   |                     |                  |   |   |   |   |   |   |   |   |   |   |   |    |   |   |                                                                                                                                                                                                                                                                                                                                                                                                                                                                                         |                    |        |                             |        |         |        |            |
| 6                                                          | 5                                                                                                                                                                                                                                            |                                                                                                                                                                                                                                                                                                                                                   |                     |                  |   |   |   |   |   |   |   |   |   |   |   |    |   |   |                                                                                                                                                                                                                                                                                                                                                                                                                                                                                         |                    |        |                             |        |         |        |            |
| 7                                                          | 6                                                                                                                                                                                                                                            |                                                                                                                                                                                                                                                                                                                                                   |                     |                  |   |   |   |   |   |   |   |   |   |   |   |    |   |   |                                                                                                                                                                                                                                                                                                                                                                                                                                                                                         |                    |        |                             |        |         |        |            |

| <p><b>6. PrEP coverage</b></p>      | <p>The number of people who used PrEP at least once during the reporting period (e.g. 12 months), divided by the size of the total PrEP-eligible population.</p>                                               | 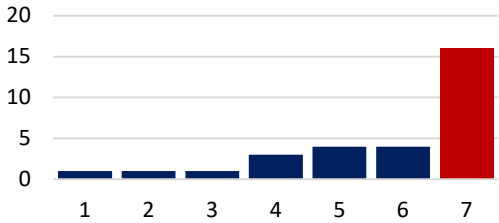 <table border="1"> <caption>PrEP Coverage Data</caption> <thead> <tr> <th>Category</th> <th>Value</th> </tr> </thead> <tbody> <tr><td>1</td><td>1</td></tr> <tr><td>2</td><td>1</td></tr> <tr><td>3</td><td>1</td></tr> <tr><td>4</td><td>3</td></tr> <tr><td>5</td><td>4</td></tr> <tr><td>6</td><td>4</td></tr> <tr><td>7</td><td>16</td></tr> </tbody> </table>      | Category | Value | 1 | 1 | 2 | 1 | 3 | 1 | 4 | 3 | 5 | 4 | 6 | 4  | 7 | 16 | <p>N/A</p> | <table border="1"> <tr> <td>Include as defined</td> <td>22.7 %</td> </tr> <tr> <td>Include modified*<br/>indicator</td> <td>9.1 %</td> </tr> <tr> <td>Exclude</td> <td>68.2 %</td> </tr> </table> <p>*For the denominator: define 'PrEP-eligibility' according to local criteria; monitor PrEP coverage only if it is expected that valid estimates of the population in need of PrEP can be made</p> <p>Outcome: retained as supplementary indicator given context-dependent challenges defining denominator (i.e. eligible population).</p> | Include as defined | 22.7 % | Include modified*<br>indicator | 9.1 %  | Exclude | 68.2 % |
|-------------------------------------|----------------------------------------------------------------------------------------------------------------------------------------------------------------------------------------------------------------|------------------------------------------------------------------------------------------------------------------------------------------------------------------------------------------------------------------------------------------------------------------------------------------------------------------------------------------------------------------------------------------------------------------------------------------------------------|----------|-------|---|---|---|---|---|---|---|---|---|---|---|----|---|----|------------|-----------------------------------------------------------------------------------------------------------------------------------------------------------------------------------------------------------------------------------------------------------------------------------------------------------------------------------------------------------------------------------------------------------------------------------------------------------------------------------------------------------------------------------------------|--------------------|--------|--------------------------------|--------|---------|--------|
| Category                            | Value                                                                                                                                                                                                          |                                                                                                                                                                                                                                                                                                                                                                                                                                                            |          |       |   |   |   |   |   |   |   |   |   |   |   |    |   |    |            |                                                                                                                                                                                                                                                                                                                                                                                                                                                                                                                                               |                    |        |                                |        |         |        |
| 1                                   | 1                                                                                                                                                                                                              |                                                                                                                                                                                                                                                                                                                                                                                                                                                            |          |       |   |   |   |   |   |   |   |   |   |   |   |    |   |    |            |                                                                                                                                                                                                                                                                                                                                                                                                                                                                                                                                               |                    |        |                                |        |         |        |
| 2                                   | 1                                                                                                                                                                                                              |                                                                                                                                                                                                                                                                                                                                                                                                                                                            |          |       |   |   |   |   |   |   |   |   |   |   |   |    |   |    |            |                                                                                                                                                                                                                                                                                                                                                                                                                                                                                                                                               |                    |        |                                |        |         |        |
| 3                                   | 1                                                                                                                                                                                                              |                                                                                                                                                                                                                                                                                                                                                                                                                                                            |          |       |   |   |   |   |   |   |   |   |   |   |   |    |   |    |            |                                                                                                                                                                                                                                                                                                                                                                                                                                                                                                                                               |                    |        |                                |        |         |        |
| 4                                   | 3                                                                                                                                                                                                              |                                                                                                                                                                                                                                                                                                                                                                                                                                                            |          |       |   |   |   |   |   |   |   |   |   |   |   |    |   |    |            |                                                                                                                                                                                                                                                                                                                                                                                                                                                                                                                                               |                    |        |                                |        |         |        |
| 5                                   | 4                                                                                                                                                                                                              |                                                                                                                                                                                                                                                                                                                                                                                                                                                            |          |       |   |   |   |   |   |   |   |   |   |   |   |    |   |    |            |                                                                                                                                                                                                                                                                                                                                                                                                                                                                                                                                               |                    |        |                                |        |         |        |
| 6                                   | 4                                                                                                                                                                                                              |                                                                                                                                                                                                                                                                                                                                                                                                                                                            |          |       |   |   |   |   |   |   |   |   |   |   |   |    |   |    |            |                                                                                                                                                                                                                                                                                                                                                                                                                                                                                                                                               |                    |        |                                |        |         |        |
| 7                                   | 16                                                                                                                                                                                                             |                                                                                                                                                                                                                                                                                                                                                                                                                                                            |          |       |   |   |   |   |   |   |   |   |   |   |   |    |   |    |            |                                                                                                                                                                                                                                                                                                                                                                                                                                                                                                                                               |                    |        |                                |        |         |        |
| Include as defined                  | 22.7 %                                                                                                                                                                                                         |                                                                                                                                                                                                                                                                                                                                                                                                                                                            |          |       |   |   |   |   |   |   |   |   |   |   |   |    |   |    |            |                                                                                                                                                                                                                                                                                                                                                                                                                                                                                                                                               |                    |        |                                |        |         |        |
| Include modified*<br>indicator      | 9.1 %                                                                                                                                                                                                          |                                                                                                                                                                                                                                                                                                                                                                                                                                                            |          |       |   |   |   |   |   |   |   |   |   |   |   |    |   |    |            |                                                                                                                                                                                                                                                                                                                                                                                                                                                                                                                                               |                    |        |                                |        |         |        |
| Exclude                             | 68.2 %                                                                                                                                                                                                         |                                                                                                                                                                                                                                                                                                                                                                                                                                                            |          |       |   |   |   |   |   |   |   |   |   |   |   |    |   |    |            |                                                                                                                                                                                                                                                                                                                                                                                                                                                                                                                                               |                    |        |                                |        |         |        |
| <p><b>7. PrEP-to-need ratio</b></p> | <p>The number of people who used PrEP at least once during the reporting period in a given area (e.g. 12 months), divided by the number of new HIV diagnoses during the reporting period (e.g. 12 months).</p> |  <table border="1"> <caption>PrEP-to-need Ratio Data</caption> <thead> <tr> <th>Category</th> <th>Value</th> </tr> </thead> <tbody> <tr><td>1</td><td>1</td></tr> <tr><td>2</td><td>1</td></tr> <tr><td>3</td><td>2</td></tr> <tr><td>4</td><td>2</td></tr> <tr><td>5</td><td>4</td></tr> <tr><td>6</td><td>12</td></tr> <tr><td>7</td><td>8</td></tr> </tbody> </table> | Category | Value | 1 | 1 | 2 | 1 | 3 | 2 | 4 | 2 | 5 | 4 | 6 | 12 | 7 | 8  | <p>N/A</p> | <table border="1"> <tr> <td>Include as defined</td> <td>45.5 %</td> </tr> <tr> <td>Include modified*<br/>indicator</td> <td>45.5 %</td> </tr> <tr> <td>Exclude</td> <td>9.1 %</td> </tr> </table> <p>*Advise to estimate the PrEP-to-need ratio across the EU/EEA in research first; If outcomes are meaningful and helpful, reconsider incorporating this indicator in routine monitoring.</p> <p>Outcome: retained as alternative supplementary indicator for PrEP coverage</p>                                                             | Include as defined | 45.5 % | Include modified*<br>indicator | 45.5 % | Exclude | 9.1 %  |
| Category                            | Value                                                                                                                                                                                                          |                                                                                                                                                                                                                                                                                                                                                                                                                                                            |          |       |   |   |   |   |   |   |   |   |   |   |   |    |   |    |            |                                                                                                                                                                                                                                                                                                                                                                                                                                                                                                                                               |                    |        |                                |        |         |        |
| 1                                   | 1                                                                                                                                                                                                              |                                                                                                                                                                                                                                                                                                                                                                                                                                                            |          |       |   |   |   |   |   |   |   |   |   |   |   |    |   |    |            |                                                                                                                                                                                                                                                                                                                                                                                                                                                                                                                                               |                    |        |                                |        |         |        |
| 2                                   | 1                                                                                                                                                                                                              |                                                                                                                                                                                                                                                                                                                                                                                                                                                            |          |       |   |   |   |   |   |   |   |   |   |   |   |    |   |    |            |                                                                                                                                                                                                                                                                                                                                                                                                                                                                                                                                               |                    |        |                                |        |         |        |
| 3                                   | 2                                                                                                                                                                                                              |                                                                                                                                                                                                                                                                                                                                                                                                                                                            |          |       |   |   |   |   |   |   |   |   |   |   |   |    |   |    |            |                                                                                                                                                                                                                                                                                                                                                                                                                                                                                                                                               |                    |        |                                |        |         |        |
| 4                                   | 2                                                                                                                                                                                                              |                                                                                                                                                                                                                                                                                                                                                                                                                                                            |          |       |   |   |   |   |   |   |   |   |   |   |   |    |   |    |            |                                                                                                                                                                                                                                                                                                                                                                                                                                                                                                                                               |                    |        |                                |        |         |        |
| 5                                   | 4                                                                                                                                                                                                              |                                                                                                                                                                                                                                                                                                                                                                                                                                                            |          |       |   |   |   |   |   |   |   |   |   |   |   |    |   |    |            |                                                                                                                                                                                                                                                                                                                                                                                                                                                                                                                                               |                    |        |                                |        |         |        |
| 6                                   | 12                                                                                                                                                                                                             |                                                                                                                                                                                                                                                                                                                                                                                                                                                            |          |       |   |   |   |   |   |   |   |   |   |   |   |    |   |    |            |                                                                                                                                                                                                                                                                                                                                                                                                                                                                                                                                               |                    |        |                                |        |         |        |
| 7                                   | 8                                                                                                                                                                                                              |                                                                                                                                                                                                                                                                                                                                                                                                                                                            |          |       |   |   |   |   |   |   |   |   |   |   |   |    |   |    |            |                                                                                                                                                                                                                                                                                                                                                                                                                                                                                                                                               |                    |        |                                |        |         |        |
| Include as defined                  | 45.5 %                                                                                                                                                                                                         |                                                                                                                                                                                                                                                                                                                                                                                                                                                            |          |       |   |   |   |   |   |   |   |   |   |   |   |    |   |    |            |                                                                                                                                                                                                                                                                                                                                                                                                                                                                                                                                               |                    |        |                                |        |         |        |
| Include modified*<br>indicator      | 45.5 %                                                                                                                                                                                                         |                                                                                                                                                                                                                                                                                                                                                                                                                                                            |          |       |   |   |   |   |   |   |   |   |   |   |   |    |   |    |            |                                                                                                                                                                                                                                                                                                                                                                                                                                                                                                                                               |                    |        |                                |        |         |        |
| Exclude                             | 9.1 %                                                                                                                                                                                                          |                                                                                                                                                                                                                                                                                                                                                                                                                                                            |          |       |   |   |   |   |   |   |   |   |   |   |   |    |   |    |            |                                                                                                                                                                                                                                                                                                                                                                                                                                                                                                                                               |                    |        |                                |        |         |        |



| <p><b>8. Adherence</b></p>             | <p>The proportion of PrEP users with sufficient or good adherence to the chosen PrEP dosing regimen (i.e. who take pills as directed to have protective drug levels in the blood during condomless intercourse).</p> | <table border="1"> <caption>Adherence Data</caption> <thead> <tr> <th>Adherence Level</th> <th>Count</th> </tr> </thead> <tbody> <tr><td>1</td><td>1</td></tr> <tr><td>2</td><td>2</td></tr> <tr><td>3</td><td>2</td></tr> <tr><td>4</td><td>7</td></tr> <tr><td>5</td><td>6</td></tr> <tr><td>6</td><td>6</td></tr> <tr><td>7</td><td>6</td></tr> </tbody> </table>                   | Adherence Level       | Count | 1 | 1 | 2 | 2 | 3 | 2 | 4 | 7 | 5 | 6 | 6 | 6  | 7 | 6 | <table border="1"> <tr><td>Include as defined</td><td>16.7 %</td></tr> <tr><td>Include modified indicator</td><td>8.3 %</td></tr> <tr><td>Exclude</td><td>75.0 %</td></tr> </table> <p>Outcome: excluded as separate indicator as panel perceived it more as a clinical monitoring indicator (not programmatic).</p>                                                                              | Include as defined | 16.7 % | Include modified indicator  | 8.3 %  | Exclude | 75.0 % | <table border="1"> <tr><td>Include as defined</td><td>9.5 %</td></tr> <tr><td>Include modified indicator</td><td>4.8 %</td></tr> <tr><td>Exclude</td><td>85.7 %</td></tr> </table>    | Include as defined | 9.5 %  | Include modified indicator  | 4.8 %  | Exclude | 85.7 % |
|----------------------------------------|----------------------------------------------------------------------------------------------------------------------------------------------------------------------------------------------------------------------|----------------------------------------------------------------------------------------------------------------------------------------------------------------------------------------------------------------------------------------------------------------------------------------------------------------------------------------------------------------------------------------|-----------------------|-------|---|---|---|---|---|---|---|---|---|---|---|----|---|---|---------------------------------------------------------------------------------------------------------------------------------------------------------------------------------------------------------------------------------------------------------------------------------------------------------------------------------------------------------------------------------------------------|--------------------|--------|-----------------------------|--------|---------|--------|---------------------------------------------------------------------------------------------------------------------------------------------------------------------------------------|--------------------|--------|-----------------------------|--------|---------|--------|
| Adherence Level                        | Count                                                                                                                                                                                                                |                                                                                                                                                                                                                                                                                                                                                                                        |                       |       |   |   |   |   |   |   |   |   |   |   |   |    |   |   |                                                                                                                                                                                                                                                                                                                                                                                                   |                    |        |                             |        |         |        |                                                                                                                                                                                       |                    |        |                             |        |         |        |
| 1                                      | 1                                                                                                                                                                                                                    |                                                                                                                                                                                                                                                                                                                                                                                        |                       |       |   |   |   |   |   |   |   |   |   |   |   |    |   |   |                                                                                                                                                                                                                                                                                                                                                                                                   |                    |        |                             |        |         |        |                                                                                                                                                                                       |                    |        |                             |        |         |        |
| 2                                      | 2                                                                                                                                                                                                                    |                                                                                                                                                                                                                                                                                                                                                                                        |                       |       |   |   |   |   |   |   |   |   |   |   |   |    |   |   |                                                                                                                                                                                                                                                                                                                                                                                                   |                    |        |                             |        |         |        |                                                                                                                                                                                       |                    |        |                             |        |         |        |
| 3                                      | 2                                                                                                                                                                                                                    |                                                                                                                                                                                                                                                                                                                                                                                        |                       |       |   |   |   |   |   |   |   |   |   |   |   |    |   |   |                                                                                                                                                                                                                                                                                                                                                                                                   |                    |        |                             |        |         |        |                                                                                                                                                                                       |                    |        |                             |        |         |        |
| 4                                      | 7                                                                                                                                                                                                                    |                                                                                                                                                                                                                                                                                                                                                                                        |                       |       |   |   |   |   |   |   |   |   |   |   |   |    |   |   |                                                                                                                                                                                                                                                                                                                                                                                                   |                    |        |                             |        |         |        |                                                                                                                                                                                       |                    |        |                             |        |         |        |
| 5                                      | 6                                                                                                                                                                                                                    |                                                                                                                                                                                                                                                                                                                                                                                        |                       |       |   |   |   |   |   |   |   |   |   |   |   |    |   |   |                                                                                                                                                                                                                                                                                                                                                                                                   |                    |        |                             |        |         |        |                                                                                                                                                                                       |                    |        |                             |        |         |        |
| 6                                      | 6                                                                                                                                                                                                                    |                                                                                                                                                                                                                                                                                                                                                                                        |                       |       |   |   |   |   |   |   |   |   |   |   |   |    |   |   |                                                                                                                                                                                                                                                                                                                                                                                                   |                    |        |                             |        |         |        |                                                                                                                                                                                       |                    |        |                             |        |         |        |
| 7                                      | 6                                                                                                                                                                                                                    |                                                                                                                                                                                                                                                                                                                                                                                        |                       |       |   |   |   |   |   |   |   |   |   |   |   |    |   |   |                                                                                                                                                                                                                                                                                                                                                                                                   |                    |        |                             |        |         |        |                                                                                                                                                                                       |                    |        |                             |        |         |        |
| Include as defined                     | 16.7 %                                                                                                                                                                                                               |                                                                                                                                                                                                                                                                                                                                                                                        |                       |       |   |   |   |   |   |   |   |   |   |   |   |    |   |   |                                                                                                                                                                                                                                                                                                                                                                                                   |                    |        |                             |        |         |        |                                                                                                                                                                                       |                    |        |                             |        |         |        |
| Include modified indicator             | 8.3 %                                                                                                                                                                                                                |                                                                                                                                                                                                                                                                                                                                                                                        |                       |       |   |   |   |   |   |   |   |   |   |   |   |    |   |   |                                                                                                                                                                                                                                                                                                                                                                                                   |                    |        |                             |        |         |        |                                                                                                                                                                                       |                    |        |                             |        |         |        |
| Exclude                                | 75.0 %                                                                                                                                                                                                               |                                                                                                                                                                                                                                                                                                                                                                                        |                       |       |   |   |   |   |   |   |   |   |   |   |   |    |   |   |                                                                                                                                                                                                                                                                                                                                                                                                   |                    |        |                             |        |         |        |                                                                                                                                                                                       |                    |        |                             |        |         |        |
| Include as defined                     | 9.5 %                                                                                                                                                                                                                |                                                                                                                                                                                                                                                                                                                                                                                        |                       |       |   |   |   |   |   |   |   |   |   |   |   |    |   |   |                                                                                                                                                                                                                                                                                                                                                                                                   |                    |        |                             |        |         |        |                                                                                                                                                                                       |                    |        |                             |        |         |        |
| Include modified indicator             | 4.8 %                                                                                                                                                                                                                |                                                                                                                                                                                                                                                                                                                                                                                        |                       |       |   |   |   |   |   |   |   |   |   |   |   |    |   |   |                                                                                                                                                                                                                                                                                                                                                                                                   |                    |        |                             |        |         |        |                                                                                                                                                                                       |                    |        |                             |        |         |        |
| Exclude                                | 85.7 %                                                                                                                                                                                                               |                                                                                                                                                                                                                                                                                                                                                                                        |                       |       |   |   |   |   |   |   |   |   |   |   |   |    |   |   |                                                                                                                                                                                                                                                                                                                                                                                                   |                    |        |                             |        |         |        |                                                                                                                                                                                       |                    |        |                             |        |         |        |
| <p><b>9. PrEP continuation</b></p>     | <p>The proportion of people who initiated PrEP and continued taking PrEP until a certain time point.</p>                                                                                                             | <table border="1"> <caption>PrEP Continuation Data</caption> <thead> <tr> <th>Continuation Level</th> <th>Count</th> </tr> </thead> <tbody> <tr><td>1</td><td>1</td></tr> <tr><td>2</td><td>1</td></tr> <tr><td>3</td><td>1</td></tr> <tr><td>4</td><td>4</td></tr> <tr><td>5</td><td>5</td></tr> <tr><td>6</td><td>13</td></tr> <tr><td>7</td><td>6</td></tr> </tbody> </table>       | Continuation Level    | Count | 1 | 1 | 2 | 1 | 3 | 1 | 4 | 4 | 5 | 5 | 6 | 13 | 7 | 6 | <table border="1"> <tr><td>Include as defined</td><td>20.8 %</td></tr> <tr><td>Include modified* indicator</td><td>16.7 %</td></tr> <tr><td>Exclude</td><td>62.5 %</td></tr> </table> <p>*Align continuation indicator with (local) PrEP follow-up guidelines</p> <p>Outcome: retained as supplementary indicator.</p>                                                                            | Include as defined | 20.8 % | Include modified* indicator | 16.7 % | Exclude | 62.5 % | <table border="1"> <tr><td>Include as defined</td><td>19.0 %</td></tr> <tr><td>Include modified* indicator</td><td>14.3 %</td></tr> <tr><td>Exclude</td><td>66.7 %</td></tr> </table> | Include as defined | 19.0 % | Include modified* indicator | 14.3 % | Exclude | 66.7 % |
| Continuation Level                     | Count                                                                                                                                                                                                                |                                                                                                                                                                                                                                                                                                                                                                                        |                       |       |   |   |   |   |   |   |   |   |   |   |   |    |   |   |                                                                                                                                                                                                                                                                                                                                                                                                   |                    |        |                             |        |         |        |                                                                                                                                                                                       |                    |        |                             |        |         |        |
| 1                                      | 1                                                                                                                                                                                                                    |                                                                                                                                                                                                                                                                                                                                                                                        |                       |       |   |   |   |   |   |   |   |   |   |   |   |    |   |   |                                                                                                                                                                                                                                                                                                                                                                                                   |                    |        |                             |        |         |        |                                                                                                                                                                                       |                    |        |                             |        |         |        |
| 2                                      | 1                                                                                                                                                                                                                    |                                                                                                                                                                                                                                                                                                                                                                                        |                       |       |   |   |   |   |   |   |   |   |   |   |   |    |   |   |                                                                                                                                                                                                                                                                                                                                                                                                   |                    |        |                             |        |         |        |                                                                                                                                                                                       |                    |        |                             |        |         |        |
| 3                                      | 1                                                                                                                                                                                                                    |                                                                                                                                                                                                                                                                                                                                                                                        |                       |       |   |   |   |   |   |   |   |   |   |   |   |    |   |   |                                                                                                                                                                                                                                                                                                                                                                                                   |                    |        |                             |        |         |        |                                                                                                                                                                                       |                    |        |                             |        |         |        |
| 4                                      | 4                                                                                                                                                                                                                    |                                                                                                                                                                                                                                                                                                                                                                                        |                       |       |   |   |   |   |   |   |   |   |   |   |   |    |   |   |                                                                                                                                                                                                                                                                                                                                                                                                   |                    |        |                             |        |         |        |                                                                                                                                                                                       |                    |        |                             |        |         |        |
| 5                                      | 5                                                                                                                                                                                                                    |                                                                                                                                                                                                                                                                                                                                                                                        |                       |       |   |   |   |   |   |   |   |   |   |   |   |    |   |   |                                                                                                                                                                                                                                                                                                                                                                                                   |                    |        |                             |        |         |        |                                                                                                                                                                                       |                    |        |                             |        |         |        |
| 6                                      | 13                                                                                                                                                                                                                   |                                                                                                                                                                                                                                                                                                                                                                                        |                       |       |   |   |   |   |   |   |   |   |   |   |   |    |   |   |                                                                                                                                                                                                                                                                                                                                                                                                   |                    |        |                             |        |         |        |                                                                                                                                                                                       |                    |        |                             |        |         |        |
| 7                                      | 6                                                                                                                                                                                                                    |                                                                                                                                                                                                                                                                                                                                                                                        |                       |       |   |   |   |   |   |   |   |   |   |   |   |    |   |   |                                                                                                                                                                                                                                                                                                                                                                                                   |                    |        |                             |        |         |        |                                                                                                                                                                                       |                    |        |                             |        |         |        |
| Include as defined                     | 20.8 %                                                                                                                                                                                                               |                                                                                                                                                                                                                                                                                                                                                                                        |                       |       |   |   |   |   |   |   |   |   |   |   |   |    |   |   |                                                                                                                                                                                                                                                                                                                                                                                                   |                    |        |                             |        |         |        |                                                                                                                                                                                       |                    |        |                             |        |         |        |
| Include modified* indicator            | 16.7 %                                                                                                                                                                                                               |                                                                                                                                                                                                                                                                                                                                                                                        |                       |       |   |   |   |   |   |   |   |   |   |   |   |    |   |   |                                                                                                                                                                                                                                                                                                                                                                                                   |                    |        |                             |        |         |        |                                                                                                                                                                                       |                    |        |                             |        |         |        |
| Exclude                                | 62.5 %                                                                                                                                                                                                               |                                                                                                                                                                                                                                                                                                                                                                                        |                       |       |   |   |   |   |   |   |   |   |   |   |   |    |   |   |                                                                                                                                                                                                                                                                                                                                                                                                   |                    |        |                             |        |         |        |                                                                                                                                                                                       |                    |        |                             |        |         |        |
| Include as defined                     | 19.0 %                                                                                                                                                                                                               |                                                                                                                                                                                                                                                                                                                                                                                        |                       |       |   |   |   |   |   |   |   |   |   |   |   |    |   |   |                                                                                                                                                                                                                                                                                                                                                                                                   |                    |        |                             |        |         |        |                                                                                                                                                                                       |                    |        |                             |        |         |        |
| Include modified* indicator            | 14.3 %                                                                                                                                                                                                               |                                                                                                                                                                                                                                                                                                                                                                                        |                       |       |   |   |   |   |   |   |   |   |   |   |   |    |   |   |                                                                                                                                                                                                                                                                                                                                                                                                   |                    |        |                             |        |         |        |                                                                                                                                                                                       |                    |        |                             |        |         |        |
| Exclude                                | 66.7 %                                                                                                                                                                                                               |                                                                                                                                                                                                                                                                                                                                                                                        |                       |       |   |   |   |   |   |   |   |   |   |   |   |    |   |   |                                                                                                                                                                                                                                                                                                                                                                                                   |                    |        |                             |        |         |        |                                                                                                                                                                                       |                    |        |                             |        |         |        |
| <p><b>10. PrEP discontinuation</b></p> | <p>The number of people who are reported to have stopped PrEP OR who did not return for a follow-up visit during the reporting period (and who still received PrEP in the previous reporting period).</p>            | <table border="1"> <caption>PrEP Discontinuation Data</caption> <thead> <tr> <th>Discontinuation Level</th> <th>Count</th> </tr> </thead> <tbody> <tr><td>1</td><td>1</td></tr> <tr><td>2</td><td>2</td></tr> <tr><td>3</td><td>2</td></tr> <tr><td>4</td><td>6</td></tr> <tr><td>5</td><td>6</td></tr> <tr><td>6</td><td>10</td></tr> <tr><td>7</td><td>5</td></tr> </tbody> </table> | Discontinuation Level | Count | 1 | 1 | 2 | 2 | 3 | 2 | 4 | 6 | 5 | 6 | 6 | 10 | 7 | 5 | <table border="1"> <tr><td>Include as defined</td><td>29.2 %</td></tr> <tr><td>Include modified* indicator</td><td>20.8 %</td></tr> <tr><td>Exclude</td><td>50.0 %</td></tr> </table> <p>*Disaggregated by whether an individual is lost-to-follow-up, and/or the reason for PrEP discontinuation.</p> <p>Outcome: excluded as separate indicator; merged with "PrEP continuation" indicator.</p> | Include as defined | 29.2 % | Include modified* indicator | 20.8 % | Exclude | 50.0 % | <table border="1"> <tr><td>Include as defined</td><td>40.9 %</td></tr> <tr><td>Include modified indicator</td><td>0.0 %</td></tr> <tr><td>Exclude</td><td>59.1 %</td></tr> </table>   | Include as defined | 40.9 % | Include modified indicator  | 0.0 %  | Exclude | 59.1 % |
| Discontinuation Level                  | Count                                                                                                                                                                                                                |                                                                                                                                                                                                                                                                                                                                                                                        |                       |       |   |   |   |   |   |   |   |   |   |   |   |    |   |   |                                                                                                                                                                                                                                                                                                                                                                                                   |                    |        |                             |        |         |        |                                                                                                                                                                                       |                    |        |                             |        |         |        |
| 1                                      | 1                                                                                                                                                                                                                    |                                                                                                                                                                                                                                                                                                                                                                                        |                       |       |   |   |   |   |   |   |   |   |   |   |   |    |   |   |                                                                                                                                                                                                                                                                                                                                                                                                   |                    |        |                             |        |         |        |                                                                                                                                                                                       |                    |        |                             |        |         |        |
| 2                                      | 2                                                                                                                                                                                                                    |                                                                                                                                                                                                                                                                                                                                                                                        |                       |       |   |   |   |   |   |   |   |   |   |   |   |    |   |   |                                                                                                                                                                                                                                                                                                                                                                                                   |                    |        |                             |        |         |        |                                                                                                                                                                                       |                    |        |                             |        |         |        |
| 3                                      | 2                                                                                                                                                                                                                    |                                                                                                                                                                                                                                                                                                                                                                                        |                       |       |   |   |   |   |   |   |   |   |   |   |   |    |   |   |                                                                                                                                                                                                                                                                                                                                                                                                   |                    |        |                             |        |         |        |                                                                                                                                                                                       |                    |        |                             |        |         |        |
| 4                                      | 6                                                                                                                                                                                                                    |                                                                                                                                                                                                                                                                                                                                                                                        |                       |       |   |   |   |   |   |   |   |   |   |   |   |    |   |   |                                                                                                                                                                                                                                                                                                                                                                                                   |                    |        |                             |        |         |        |                                                                                                                                                                                       |                    |        |                             |        |         |        |
| 5                                      | 6                                                                                                                                                                                                                    |                                                                                                                                                                                                                                                                                                                                                                                        |                       |       |   |   |   |   |   |   |   |   |   |   |   |    |   |   |                                                                                                                                                                                                                                                                                                                                                                                                   |                    |        |                             |        |         |        |                                                                                                                                                                                       |                    |        |                             |        |         |        |
| 6                                      | 10                                                                                                                                                                                                                   |                                                                                                                                                                                                                                                                                                                                                                                        |                       |       |   |   |   |   |   |   |   |   |   |   |   |    |   |   |                                                                                                                                                                                                                                                                                                                                                                                                   |                    |        |                             |        |         |        |                                                                                                                                                                                       |                    |        |                             |        |         |        |
| 7                                      | 5                                                                                                                                                                                                                    |                                                                                                                                                                                                                                                                                                                                                                                        |                       |       |   |   |   |   |   |   |   |   |   |   |   |    |   |   |                                                                                                                                                                                                                                                                                                                                                                                                   |                    |        |                             |        |         |        |                                                                                                                                                                                       |                    |        |                             |        |         |        |
| Include as defined                     | 29.2 %                                                                                                                                                                                                               |                                                                                                                                                                                                                                                                                                                                                                                        |                       |       |   |   |   |   |   |   |   |   |   |   |   |    |   |   |                                                                                                                                                                                                                                                                                                                                                                                                   |                    |        |                             |        |         |        |                                                                                                                                                                                       |                    |        |                             |        |         |        |
| Include modified* indicator            | 20.8 %                                                                                                                                                                                                               |                                                                                                                                                                                                                                                                                                                                                                                        |                       |       |   |   |   |   |   |   |   |   |   |   |   |    |   |   |                                                                                                                                                                                                                                                                                                                                                                                                   |                    |        |                             |        |         |        |                                                                                                                                                                                       |                    |        |                             |        |         |        |
| Exclude                                | 50.0 %                                                                                                                                                                                                               |                                                                                                                                                                                                                                                                                                                                                                                        |                       |       |   |   |   |   |   |   |   |   |   |   |   |    |   |   |                                                                                                                                                                                                                                                                                                                                                                                                   |                    |        |                             |        |         |        |                                                                                                                                                                                       |                    |        |                             |        |         |        |
| Include as defined                     | 40.9 %                                                                                                                                                                                                               |                                                                                                                                                                                                                                                                                                                                                                                        |                       |       |   |   |   |   |   |   |   |   |   |   |   |    |   |   |                                                                                                                                                                                                                                                                                                                                                                                                   |                    |        |                             |        |         |        |                                                                                                                                                                                       |                    |        |                             |        |         |        |
| Include modified indicator             | 0.0 %                                                                                                                                                                                                                |                                                                                                                                                                                                                                                                                                                                                                                        |                       |       |   |   |   |   |   |   |   |   |   |   |   |    |   |   |                                                                                                                                                                                                                                                                                                                                                                                                   |                    |        |                             |        |         |        |                                                                                                                                                                                       |                    |        |                             |        |         |        |
| Exclude                                | 59.1 %                                                                                                                                                                                                               |                                                                                                                                                                                                                                                                                                                                                                                        |                       |       |   |   |   |   |   |   |   |   |   |   |   |    |   |   |                                                                                                                                                                                                                                                                                                                                                                                                   |                    |        |                             |        |         |        |                                                                                                                                                                                       |                    |        |                             |        |         |        |

| <b>11. Retention in care</b>                  | <p>The number of HIV tests performed among all PrEP users during the reporting period (e.g. 12 months), divided by the number of HIV tests expected to have been performed among all PrEP users during the reporting period (e.g. 12 months).</p> | 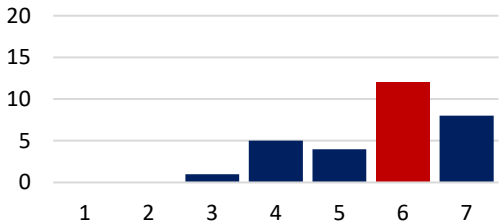 <table border="1"> <thead> <tr> <th>Number of tests</th> <th>Count</th> </tr> </thead> <tbody> <tr><td>1</td><td>0</td></tr> <tr><td>2</td><td>0</td></tr> <tr><td>3</td><td>1</td></tr> <tr><td>4</td><td>5</td></tr> <tr><td>5</td><td>4</td></tr> <tr><td>6</td><td>12</td></tr> <tr><td>7</td><td>8</td></tr> </tbody> </table>        | Number of tests     | Count | 1 | 0 | 2 | 0 | 3 | 1 | 4 | 5 | 5 | 4 | 6 | 12 | 7 | 8  | <table border="1"> <tr> <td>Include as defined</td> <td>34.8 %</td> </tr> <tr> <td>Include modified* indicator</td> <td>26.1 %</td> </tr> <tr> <td>Exclude</td> <td>39.1 %</td> </tr> </table> <p>*Preference to base retention on follow-up visit attendance, rather than HIV testing adherence</p> <p>Outcome: excluded as separate indicator due to lack of accuracy and relevance.</p> | Include as defined                                                                                                                                                                                                                                                                                                                                                                                                                | 34.8 %             | Include modified* indicator | 26.1 %                      | Exclude | 39.1 %  | <table border="1"> <tr> <td>Include as defined</td> <td>35.0 %</td> </tr> <tr> <td>Include modified* indicator</td> <td>10.0 %</td> </tr> <tr> <td>Exclude</td> <td>55.0 %</td> </tr> </table> <p>*Preference to base retention on follow-up visit attendance, rather than HIV testing adherence</p> | Include as defined | 35.0 % | Include modified* indicator | 10.0 % | Exclude | 55.0 % |
|-----------------------------------------------|---------------------------------------------------------------------------------------------------------------------------------------------------------------------------------------------------------------------------------------------------|-------------------------------------------------------------------------------------------------------------------------------------------------------------------------------------------------------------------------------------------------------------------------------------------------------------------------------------------------------------------------------------------------------------------------------|---------------------|-------|---|---|---|---|---|---|---|---|---|---|---|----|---|----|--------------------------------------------------------------------------------------------------------------------------------------------------------------------------------------------------------------------------------------------------------------------------------------------------------------------------------------------------------------------------------------------|-----------------------------------------------------------------------------------------------------------------------------------------------------------------------------------------------------------------------------------------------------------------------------------------------------------------------------------------------------------------------------------------------------------------------------------|--------------------|-----------------------------|-----------------------------|---------|---------|------------------------------------------------------------------------------------------------------------------------------------------------------------------------------------------------------------------------------------------------------------------------------------------------------|--------------------|--------|-----------------------------|--------|---------|--------|
| Number of tests                               | Count                                                                                                                                                                                                                                             |                                                                                                                                                                                                                                                                                                                                                                                                                               |                     |       |   |   |   |   |   |   |   |   |   |   |   |    |   |    |                                                                                                                                                                                                                                                                                                                                                                                            |                                                                                                                                                                                                                                                                                                                                                                                                                                   |                    |                             |                             |         |         |                                                                                                                                                                                                                                                                                                      |                    |        |                             |        |         |        |
| 1                                             | 0                                                                                                                                                                                                                                                 |                                                                                                                                                                                                                                                                                                                                                                                                                               |                     |       |   |   |   |   |   |   |   |   |   |   |   |    |   |    |                                                                                                                                                                                                                                                                                                                                                                                            |                                                                                                                                                                                                                                                                                                                                                                                                                                   |                    |                             |                             |         |         |                                                                                                                                                                                                                                                                                                      |                    |        |                             |        |         |        |
| 2                                             | 0                                                                                                                                                                                                                                                 |                                                                                                                                                                                                                                                                                                                                                                                                                               |                     |       |   |   |   |   |   |   |   |   |   |   |   |    |   |    |                                                                                                                                                                                                                                                                                                                                                                                            |                                                                                                                                                                                                                                                                                                                                                                                                                                   |                    |                             |                             |         |         |                                                                                                                                                                                                                                                                                                      |                    |        |                             |        |         |        |
| 3                                             | 1                                                                                                                                                                                                                                                 |                                                                                                                                                                                                                                                                                                                                                                                                                               |                     |       |   |   |   |   |   |   |   |   |   |   |   |    |   |    |                                                                                                                                                                                                                                                                                                                                                                                            |                                                                                                                                                                                                                                                                                                                                                                                                                                   |                    |                             |                             |         |         |                                                                                                                                                                                                                                                                                                      |                    |        |                             |        |         |        |
| 4                                             | 5                                                                                                                                                                                                                                                 |                                                                                                                                                                                                                                                                                                                                                                                                                               |                     |       |   |   |   |   |   |   |   |   |   |   |   |    |   |    |                                                                                                                                                                                                                                                                                                                                                                                            |                                                                                                                                                                                                                                                                                                                                                                                                                                   |                    |                             |                             |         |         |                                                                                                                                                                                                                                                                                                      |                    |        |                             |        |         |        |
| 5                                             | 4                                                                                                                                                                                                                                                 |                                                                                                                                                                                                                                                                                                                                                                                                                               |                     |       |   |   |   |   |   |   |   |   |   |   |   |    |   |    |                                                                                                                                                                                                                                                                                                                                                                                            |                                                                                                                                                                                                                                                                                                                                                                                                                                   |                    |                             |                             |         |         |                                                                                                                                                                                                                                                                                                      |                    |        |                             |        |         |        |
| 6                                             | 12                                                                                                                                                                                                                                                |                                                                                                                                                                                                                                                                                                                                                                                                                               |                     |       |   |   |   |   |   |   |   |   |   |   |   |    |   |    |                                                                                                                                                                                                                                                                                                                                                                                            |                                                                                                                                                                                                                                                                                                                                                                                                                                   |                    |                             |                             |         |         |                                                                                                                                                                                                                                                                                                      |                    |        |                             |        |         |        |
| 7                                             | 8                                                                                                                                                                                                                                                 |                                                                                                                                                                                                                                                                                                                                                                                                                               |                     |       |   |   |   |   |   |   |   |   |   |   |   |    |   |    |                                                                                                                                                                                                                                                                                                                                                                                            |                                                                                                                                                                                                                                                                                                                                                                                                                                   |                    |                             |                             |         |         |                                                                                                                                                                                                                                                                                                      |                    |        |                             |        |         |        |
| Include as defined                            | 34.8 %                                                                                                                                                                                                                                            |                                                                                                                                                                                                                                                                                                                                                                                                                               |                     |       |   |   |   |   |   |   |   |   |   |   |   |    |   |    |                                                                                                                                                                                                                                                                                                                                                                                            |                                                                                                                                                                                                                                                                                                                                                                                                                                   |                    |                             |                             |         |         |                                                                                                                                                                                                                                                                                                      |                    |        |                             |        |         |        |
| Include modified* indicator                   | 26.1 %                                                                                                                                                                                                                                            |                                                                                                                                                                                                                                                                                                                                                                                                                               |                     |       |   |   |   |   |   |   |   |   |   |   |   |    |   |    |                                                                                                                                                                                                                                                                                                                                                                                            |                                                                                                                                                                                                                                                                                                                                                                                                                                   |                    |                             |                             |         |         |                                                                                                                                                                                                                                                                                                      |                    |        |                             |        |         |        |
| Exclude                                       | 39.1 %                                                                                                                                                                                                                                            |                                                                                                                                                                                                                                                                                                                                                                                                                               |                     |       |   |   |   |   |   |   |   |   |   |   |   |    |   |    |                                                                                                                                                                                                                                                                                                                                                                                            |                                                                                                                                                                                                                                                                                                                                                                                                                                   |                    |                             |                             |         |         |                                                                                                                                                                                                                                                                                                      |                    |        |                             |        |         |        |
| Include as defined                            | 35.0 %                                                                                                                                                                                                                                            |                                                                                                                                                                                                                                                                                                                                                                                                                               |                     |       |   |   |   |   |   |   |   |   |   |   |   |    |   |    |                                                                                                                                                                                                                                                                                                                                                                                            |                                                                                                                                                                                                                                                                                                                                                                                                                                   |                    |                             |                             |         |         |                                                                                                                                                                                                                                                                                                      |                    |        |                             |        |         |        |
| Include modified* indicator                   | 10.0 %                                                                                                                                                                                                                                            |                                                                                                                                                                                                                                                                                                                                                                                                                               |                     |       |   |   |   |   |   |   |   |   |   |   |   |    |   |    |                                                                                                                                                                                                                                                                                                                                                                                            |                                                                                                                                                                                                                                                                                                                                                                                                                                   |                    |                             |                             |         |         |                                                                                                                                                                                                                                                                                                      |                    |        |                             |        |         |        |
| Exclude                                       | 55.0 %                                                                                                                                                                                                                                            |                                                                                                                                                                                                                                                                                                                                                                                                                               |                     |       |   |   |   |   |   |   |   |   |   |   |   |    |   |    |                                                                                                                                                                                                                                                                                                                                                                                            |                                                                                                                                                                                                                                                                                                                                                                                                                                   |                    |                             |                             |         |         |                                                                                                                                                                                                                                                                                                      |                    |        |                             |        |         |        |
| <b>12. New HIV diagnoses among PrEP users</b> | <p>The number of new HIV diagnoses among people prescribed PrEP at least once during the reporting period and who had at least one follow-up HIV test.</p>                                                                                        |  <table border="1"> <thead> <tr> <th>Number of diagnoses</th> <th>Count</th> </tr> </thead> <tbody> <tr><td>1</td><td>0</td></tr> <tr><td>2</td><td>0</td></tr> <tr><td>3</td><td>0</td></tr> <tr><td>4</td><td>0</td></tr> <tr><td>5</td><td>2</td></tr> <tr><td>6</td><td>3</td></tr> <tr><td>7</td><td>25</td></tr> </tbody> </table>    | Number of diagnoses | Count | 1 | 0 | 2 | 0 | 3 | 0 | 4 | 0 | 5 | 2 | 6 | 3  | 7 | 25 | <p>N/A</p>                                                                                                                                                                                                                                                                                                                                                                                 | <table border="1"> <tr> <td>Include as defined</td> <td>54.2 %</td> </tr> <tr> <td>Include modified* indicator</td> <td>41.7 %</td> </tr> <tr> <td>Exclude</td> <td>4.2 %</td> </tr> </table> <p>*New HIV diagnoses among people who ever used PrEP, disaggregated whether or not the individual recently used PrEP (i.e., in the last 12 months)</p> <p>Outcome: refined indicator retained as core indicator.</p>               | Include as defined | 54.2 %                      | Include modified* indicator | 41.7 %  | Exclude | 4.2 %                                                                                                                                                                                                                                                                                                |                    |        |                             |        |         |        |
| Number of diagnoses                           | Count                                                                                                                                                                                                                                             |                                                                                                                                                                                                                                                                                                                                                                                                                               |                     |       |   |   |   |   |   |   |   |   |   |   |   |    |   |    |                                                                                                                                                                                                                                                                                                                                                                                            |                                                                                                                                                                                                                                                                                                                                                                                                                                   |                    |                             |                             |         |         |                                                                                                                                                                                                                                                                                                      |                    |        |                             |        |         |        |
| 1                                             | 0                                                                                                                                                                                                                                                 |                                                                                                                                                                                                                                                                                                                                                                                                                               |                     |       |   |   |   |   |   |   |   |   |   |   |   |    |   |    |                                                                                                                                                                                                                                                                                                                                                                                            |                                                                                                                                                                                                                                                                                                                                                                                                                                   |                    |                             |                             |         |         |                                                                                                                                                                                                                                                                                                      |                    |        |                             |        |         |        |
| 2                                             | 0                                                                                                                                                                                                                                                 |                                                                                                                                                                                                                                                                                                                                                                                                                               |                     |       |   |   |   |   |   |   |   |   |   |   |   |    |   |    |                                                                                                                                                                                                                                                                                                                                                                                            |                                                                                                                                                                                                                                                                                                                                                                                                                                   |                    |                             |                             |         |         |                                                                                                                                                                                                                                                                                                      |                    |        |                             |        |         |        |
| 3                                             | 0                                                                                                                                                                                                                                                 |                                                                                                                                                                                                                                                                                                                                                                                                                               |                     |       |   |   |   |   |   |   |   |   |   |   |   |    |   |    |                                                                                                                                                                                                                                                                                                                                                                                            |                                                                                                                                                                                                                                                                                                                                                                                                                                   |                    |                             |                             |         |         |                                                                                                                                                                                                                                                                                                      |                    |        |                             |        |         |        |
| 4                                             | 0                                                                                                                                                                                                                                                 |                                                                                                                                                                                                                                                                                                                                                                                                                               |                     |       |   |   |   |   |   |   |   |   |   |   |   |    |   |    |                                                                                                                                                                                                                                                                                                                                                                                            |                                                                                                                                                                                                                                                                                                                                                                                                                                   |                    |                             |                             |         |         |                                                                                                                                                                                                                                                                                                      |                    |        |                             |        |         |        |
| 5                                             | 2                                                                                                                                                                                                                                                 |                                                                                                                                                                                                                                                                                                                                                                                                                               |                     |       |   |   |   |   |   |   |   |   |   |   |   |    |   |    |                                                                                                                                                                                                                                                                                                                                                                                            |                                                                                                                                                                                                                                                                                                                                                                                                                                   |                    |                             |                             |         |         |                                                                                                                                                                                                                                                                                                      |                    |        |                             |        |         |        |
| 6                                             | 3                                                                                                                                                                                                                                                 |                                                                                                                                                                                                                                                                                                                                                                                                                               |                     |       |   |   |   |   |   |   |   |   |   |   |   |    |   |    |                                                                                                                                                                                                                                                                                                                                                                                            |                                                                                                                                                                                                                                                                                                                                                                                                                                   |                    |                             |                             |         |         |                                                                                                                                                                                                                                                                                                      |                    |        |                             |        |         |        |
| 7                                             | 25                                                                                                                                                                                                                                                |                                                                                                                                                                                                                                                                                                                                                                                                                               |                     |       |   |   |   |   |   |   |   |   |   |   |   |    |   |    |                                                                                                                                                                                                                                                                                                                                                                                            |                                                                                                                                                                                                                                                                                                                                                                                                                                   |                    |                             |                             |         |         |                                                                                                                                                                                                                                                                                                      |                    |        |                             |        |         |        |
| Include as defined                            | 54.2 %                                                                                                                                                                                                                                            |                                                                                                                                                                                                                                                                                                                                                                                                                               |                     |       |   |   |   |   |   |   |   |   |   |   |   |    |   |    |                                                                                                                                                                                                                                                                                                                                                                                            |                                                                                                                                                                                                                                                                                                                                                                                                                                   |                    |                             |                             |         |         |                                                                                                                                                                                                                                                                                                      |                    |        |                             |        |         |        |
| Include modified* indicator                   | 41.7 %                                                                                                                                                                                                                                            |                                                                                                                                                                                                                                                                                                                                                                                                                               |                     |       |   |   |   |   |   |   |   |   |   |   |   |    |   |    |                                                                                                                                                                                                                                                                                                                                                                                            |                                                                                                                                                                                                                                                                                                                                                                                                                                   |                    |                             |                             |         |         |                                                                                                                                                                                                                                                                                                      |                    |        |                             |        |         |        |
| Exclude                                       | 4.2 %                                                                                                                                                                                                                                             |                                                                                                                                                                                                                                                                                                                                                                                                                               |                     |       |   |   |   |   |   |   |   |   |   |   |   |    |   |    |                                                                                                                                                                                                                                                                                                                                                                                            |                                                                                                                                                                                                                                                                                                                                                                                                                                   |                    |                             |                             |         |         |                                                                                                                                                                                                                                                                                                      |                    |        |                             |        |         |        |
| <b>13. STI diagnoses</b>                      | <p>The number of new diagnoses of chlamydia, gonorrhoea and syphilis among PrEP users during the reporting period.</p>                                                                                                                            |  <table border="1"> <thead> <tr> <th>Number of diagnoses</th> <th>Count</th> </tr> </thead> <tbody> <tr><td>1</td><td>0</td></tr> <tr><td>2</td><td>0</td></tr> <tr><td>3</td><td>0</td></tr> <tr><td>4</td><td>1</td></tr> <tr><td>5</td><td>5</td></tr> <tr><td>6</td><td>10</td></tr> <tr><td>7</td><td>14</td></tr> </tbody> </table> | Number of diagnoses | Count | 1 | 0 | 2 | 0 | 3 | 0 | 4 | 1 | 5 | 5 | 6 | 10 | 7 | 14 | <p>N/A</p>                                                                                                                                                                                                                                                                                                                                                                                 | <table border="1"> <tr> <td>Include as defined</td> <td>59.1 %</td> </tr> <tr> <td>Include modified* indicator</td> <td>22.7 %</td> </tr> <tr> <td>Exclude</td> <td>18.2 %</td> </tr> </table> <p>*Number of PrEP users newly diagnosed with chlamydia, gonorrhoea, syphilis or Hepatitis C during the reporting period.</p> <p>Outcome: excluded as separate indicator due to outside scope of PrEP monitoring tool as such;</p> | Include as defined | 59.1 %                      | Include modified* indicator | 22.7 %  | Exclude | 18.2 %                                                                                                                                                                                                                                                                                               |                    |        |                             |        |         |        |
| Number of diagnoses                           | Count                                                                                                                                                                                                                                             |                                                                                                                                                                                                                                                                                                                                                                                                                               |                     |       |   |   |   |   |   |   |   |   |   |   |   |    |   |    |                                                                                                                                                                                                                                                                                                                                                                                            |                                                                                                                                                                                                                                                                                                                                                                                                                                   |                    |                             |                             |         |         |                                                                                                                                                                                                                                                                                                      |                    |        |                             |        |         |        |
| 1                                             | 0                                                                                                                                                                                                                                                 |                                                                                                                                                                                                                                                                                                                                                                                                                               |                     |       |   |   |   |   |   |   |   |   |   |   |   |    |   |    |                                                                                                                                                                                                                                                                                                                                                                                            |                                                                                                                                                                                                                                                                                                                                                                                                                                   |                    |                             |                             |         |         |                                                                                                                                                                                                                                                                                                      |                    |        |                             |        |         |        |
| 2                                             | 0                                                                                                                                                                                                                                                 |                                                                                                                                                                                                                                                                                                                                                                                                                               |                     |       |   |   |   |   |   |   |   |   |   |   |   |    |   |    |                                                                                                                                                                                                                                                                                                                                                                                            |                                                                                                                                                                                                                                                                                                                                                                                                                                   |                    |                             |                             |         |         |                                                                                                                                                                                                                                                                                                      |                    |        |                             |        |         |        |
| 3                                             | 0                                                                                                                                                                                                                                                 |                                                                                                                                                                                                                                                                                                                                                                                                                               |                     |       |   |   |   |   |   |   |   |   |   |   |   |    |   |    |                                                                                                                                                                                                                                                                                                                                                                                            |                                                                                                                                                                                                                                                                                                                                                                                                                                   |                    |                             |                             |         |         |                                                                                                                                                                                                                                                                                                      |                    |        |                             |        |         |        |
| 4                                             | 1                                                                                                                                                                                                                                                 |                                                                                                                                                                                                                                                                                                                                                                                                                               |                     |       |   |   |   |   |   |   |   |   |   |   |   |    |   |    |                                                                                                                                                                                                                                                                                                                                                                                            |                                                                                                                                                                                                                                                                                                                                                                                                                                   |                    |                             |                             |         |         |                                                                                                                                                                                                                                                                                                      |                    |        |                             |        |         |        |
| 5                                             | 5                                                                                                                                                                                                                                                 |                                                                                                                                                                                                                                                                                                                                                                                                                               |                     |       |   |   |   |   |   |   |   |   |   |   |   |    |   |    |                                                                                                                                                                                                                                                                                                                                                                                            |                                                                                                                                                                                                                                                                                                                                                                                                                                   |                    |                             |                             |         |         |                                                                                                                                                                                                                                                                                                      |                    |        |                             |        |         |        |
| 6                                             | 10                                                                                                                                                                                                                                                |                                                                                                                                                                                                                                                                                                                                                                                                                               |                     |       |   |   |   |   |   |   |   |   |   |   |   |    |   |    |                                                                                                                                                                                                                                                                                                                                                                                            |                                                                                                                                                                                                                                                                                                                                                                                                                                   |                    |                             |                             |         |         |                                                                                                                                                                                                                                                                                                      |                    |        |                             |        |         |        |
| 7                                             | 14                                                                                                                                                                                                                                                |                                                                                                                                                                                                                                                                                                                                                                                                                               |                     |       |   |   |   |   |   |   |   |   |   |   |   |    |   |    |                                                                                                                                                                                                                                                                                                                                                                                            |                                                                                                                                                                                                                                                                                                                                                                                                                                   |                    |                             |                             |         |         |                                                                                                                                                                                                                                                                                                      |                    |        |                             |        |         |        |
| Include as defined                            | 59.1 %                                                                                                                                                                                                                                            |                                                                                                                                                                                                                                                                                                                                                                                                                               |                     |       |   |   |   |   |   |   |   |   |   |   |   |    |   |    |                                                                                                                                                                                                                                                                                                                                                                                            |                                                                                                                                                                                                                                                                                                                                                                                                                                   |                    |                             |                             |         |         |                                                                                                                                                                                                                                                                                                      |                    |        |                             |        |         |        |
| Include modified* indicator                   | 22.7 %                                                                                                                                                                                                                                            |                                                                                                                                                                                                                                                                                                                                                                                                                               |                     |       |   |   |   |   |   |   |   |   |   |   |   |    |   |    |                                                                                                                                                                                                                                                                                                                                                                                            |                                                                                                                                                                                                                                                                                                                                                                                                                                   |                    |                             |                             |         |         |                                                                                                                                                                                                                                                                                                      |                    |        |                             |        |         |        |
| Exclude                                       | 18.2 %                                                                                                                                                                                                                                            |                                                                                                                                                                                                                                                                                                                                                                                                                               |                     |       |   |   |   |   |   |   |   |   |   |   |   |    |   |    |                                                                                                                                                                                                                                                                                                                                                                                            |                                                                                                                                                                                                                                                                                                                                                                                                                                   |                    |                             |                             |         |         |                                                                                                                                                                                                                                                                                                      |                    |        |                             |        |         |        |

|                                      |                                                                                                                                                                                                         |                                                                                                                                                                                                                                                                                                                                                                                |          | suggestion included to integrate PrEP monitoring with STI monitoring systems. |   |   |   |   |   |   |   |   |   |   |   |   |   |    |                                                                                                                                                                                                                                                             |                    |        |                            |        |         |       |     |
|--------------------------------------|---------------------------------------------------------------------------------------------------------------------------------------------------------------------------------------------------------|--------------------------------------------------------------------------------------------------------------------------------------------------------------------------------------------------------------------------------------------------------------------------------------------------------------------------------------------------------------------------------|----------|-------------------------------------------------------------------------------|---|---|---|---|---|---|---|---|---|---|---|---|---|----|-------------------------------------------------------------------------------------------------------------------------------------------------------------------------------------------------------------------------------------------------------------|--------------------|--------|----------------------------|--------|---------|-------|-----|
| <b>14. PrEP safety</b>               | The number and type of (serious) adverse events that occur among PrEP users during the reporting period and are related to PrEP use.                                                                    | <table border="1"> <caption>Adverse Events Data</caption> <thead> <tr> <th>Category</th> <th>Count</th> </tr> </thead> <tbody> <tr><td>1</td><td>3</td></tr> <tr><td>2</td><td>0</td></tr> <tr><td>3</td><td>3</td></tr> <tr><td>4</td><td>2</td></tr> <tr><td>5</td><td>3</td></tr> <tr><td>6</td><td>7</td></tr> <tr><td>7</td><td>12</td></tr> </tbody> </table>            | Category | Count                                                                         | 1 | 3 | 2 | 0 | 3 | 3 | 4 | 2 | 5 | 3 | 6 | 7 | 7 | 12 | Outcome: excluded as separate indicator; not discussed during Delphi session 2 – to be linked to general pharmacovigilance monitoring                                                                                                                       |                    |        |                            |        |         |       |     |
| Category                             | Count                                                                                                                                                                                                   |                                                                                                                                                                                                                                                                                                                                                                                |          |                                                                               |   |   |   |   |   |   |   |   |   |   |   |   |   |    |                                                                                                                                                                                                                                                             |                    |        |                            |        |         |       |     |
| 1                                    | 3                                                                                                                                                                                                       |                                                                                                                                                                                                                                                                                                                                                                                |          |                                                                               |   |   |   |   |   |   |   |   |   |   |   |   |   |    |                                                                                                                                                                                                                                                             |                    |        |                            |        |         |       |     |
| 2                                    | 0                                                                                                                                                                                                       |                                                                                                                                                                                                                                                                                                                                                                                |          |                                                                               |   |   |   |   |   |   |   |   |   |   |   |   |   |    |                                                                                                                                                                                                                                                             |                    |        |                            |        |         |       |     |
| 3                                    | 3                                                                                                                                                                                                       |                                                                                                                                                                                                                                                                                                                                                                                |          |                                                                               |   |   |   |   |   |   |   |   |   |   |   |   |   |    |                                                                                                                                                                                                                                                             |                    |        |                            |        |         |       |     |
| 4                                    | 2                                                                                                                                                                                                       |                                                                                                                                                                                                                                                                                                                                                                                |          |                                                                               |   |   |   |   |   |   |   |   |   |   |   |   |   |    |                                                                                                                                                                                                                                                             |                    |        |                            |        |         |       |     |
| 5                                    | 3                                                                                                                                                                                                       |                                                                                                                                                                                                                                                                                                                                                                                |          |                                                                               |   |   |   |   |   |   |   |   |   |   |   |   |   |    |                                                                                                                                                                                                                                                             |                    |        |                            |        |         |       |     |
| 6                                    | 7                                                                                                                                                                                                       |                                                                                                                                                                                                                                                                                                                                                                                |          |                                                                               |   |   |   |   |   |   |   |   |   |   |   |   |   |    |                                                                                                                                                                                                                                                             |                    |        |                            |        |         |       |     |
| 7                                    | 12                                                                                                                                                                                                      |                                                                                                                                                                                                                                                                                                                                                                                |          |                                                                               |   |   |   |   |   |   |   |   |   |   |   |   |   |    |                                                                                                                                                                                                                                                             |                    |        |                            |        |         |       |     |
| <b>15. ARV resistance</b>            | The proportion of blood specimens from PrEP users or people with a history of PrEP use and diagnosed with HIV that were tested and which show genetic mutations associated with (ineffective) PrEP use. | <table border="1"> <caption>ARV Resistance Data</caption> <thead> <tr> <th>Category</th> <th>Count</th> </tr> </thead> <tbody> <tr><td>1</td><td>0</td></tr> <tr><td>2</td><td>1</td></tr> <tr><td>3</td><td>1</td></tr> <tr><td>4</td><td>3</td></tr> <tr><td>5</td><td>4</td></tr> <tr><td>6</td><td>7</td></tr> <tr><td>7</td><td>14</td></tr> </tbody> </table>            | Category | Count                                                                         | 1 | 0 | 2 | 1 | 3 | 1 | 4 | 3 | 5 | 4 | 6 | 7 | 7 | 14 | Outcome: excluded as separate indicator; not discussed during Delphi session 2 – to be linked to general HIV monitoring                                                                                                                                     |                    |        |                            |        |         |       |     |
| Category                             | Count                                                                                                                                                                                                   |                                                                                                                                                                                                                                                                                                                                                                                |          |                                                                               |   |   |   |   |   |   |   |   |   |   |   |   |   |    |                                                                                                                                                                                                                                                             |                    |        |                            |        |         |       |     |
| 1                                    | 0                                                                                                                                                                                                       |                                                                                                                                                                                                                                                                                                                                                                                |          |                                                                               |   |   |   |   |   |   |   |   |   |   |   |   |   |    |                                                                                                                                                                                                                                                             |                    |        |                            |        |         |       |     |
| 2                                    | 1                                                                                                                                                                                                       |                                                                                                                                                                                                                                                                                                                                                                                |          |                                                                               |   |   |   |   |   |   |   |   |   |   |   |   |   |    |                                                                                                                                                                                                                                                             |                    |        |                            |        |         |       |     |
| 3                                    | 1                                                                                                                                                                                                       |                                                                                                                                                                                                                                                                                                                                                                                |          |                                                                               |   |   |   |   |   |   |   |   |   |   |   |   |   |    |                                                                                                                                                                                                                                                             |                    |        |                            |        |         |       |     |
| 4                                    | 3                                                                                                                                                                                                       |                                                                                                                                                                                                                                                                                                                                                                                |          |                                                                               |   |   |   |   |   |   |   |   |   |   |   |   |   |    |                                                                                                                                                                                                                                                             |                    |        |                            |        |         |       |     |
| 5                                    | 4                                                                                                                                                                                                       |                                                                                                                                                                                                                                                                                                                                                                                |          |                                                                               |   |   |   |   |   |   |   |   |   |   |   |   |   |    |                                                                                                                                                                                                                                                             |                    |        |                            |        |         |       |     |
| 6                                    | 7                                                                                                                                                                                                       |                                                                                                                                                                                                                                                                                                                                                                                |          |                                                                               |   |   |   |   |   |   |   |   |   |   |   |   |   |    |                                                                                                                                                                                                                                                             |                    |        |                            |        |         |       |     |
| 7                                    | 14                                                                                                                                                                                                      |                                                                                                                                                                                                                                                                                                                                                                                |          |                                                                               |   |   |   |   |   |   |   |   |   |   |   |   |   |    |                                                                                                                                                                                                                                                             |                    |        |                            |        |         |       |     |
| <b>16. PrEP service availability</b> | The number of PrEP providers in a given area or per 100.000 population.                                                                                                                                 | <table border="1"> <caption>PrEP Service Availability Data</caption> <thead> <tr> <th>Category</th> <th>Count</th> </tr> </thead> <tbody> <tr><td>1</td><td>1</td></tr> <tr><td>2</td><td>1</td></tr> <tr><td>3</td><td>3</td></tr> <tr><td>4</td><td>3</td></tr> <tr><td>5</td><td>4</td></tr> <tr><td>6</td><td>6</td></tr> <tr><td>7</td><td>12</td></tr> </tbody> </table> | Category | Count                                                                         | 1 | 1 | 2 | 1 | 3 | 3 | 4 | 3 | 5 | 4 | 6 | 6 | 7 | 12 | <table border="1"> <tr> <td>Include as defined</td> <td>79.2 %</td> </tr> <tr> <td>Include modified indicator</td> <td>12.5 %</td> </tr> <tr> <td>Exclude</td> <td>8.3 %</td> </tr> </table> <p>Outcome: indicator retained as supplementary indicator.</p> | Include as defined | 79.2 % | Include modified indicator | 12.5 % | Exclude | 8.3 % | N/A |
| Category                             | Count                                                                                                                                                                                                   |                                                                                                                                                                                                                                                                                                                                                                                |          |                                                                               |   |   |   |   |   |   |   |   |   |   |   |   |   |    |                                                                                                                                                                                                                                                             |                    |        |                            |        |         |       |     |
| 1                                    | 1                                                                                                                                                                                                       |                                                                                                                                                                                                                                                                                                                                                                                |          |                                                                               |   |   |   |   |   |   |   |   |   |   |   |   |   |    |                                                                                                                                                                                                                                                             |                    |        |                            |        |         |       |     |
| 2                                    | 1                                                                                                                                                                                                       |                                                                                                                                                                                                                                                                                                                                                                                |          |                                                                               |   |   |   |   |   |   |   |   |   |   |   |   |   |    |                                                                                                                                                                                                                                                             |                    |        |                            |        |         |       |     |
| 3                                    | 3                                                                                                                                                                                                       |                                                                                                                                                                                                                                                                                                                                                                                |          |                                                                               |   |   |   |   |   |   |   |   |   |   |   |   |   |    |                                                                                                                                                                                                                                                             |                    |        |                            |        |         |       |     |
| 4                                    | 3                                                                                                                                                                                                       |                                                                                                                                                                                                                                                                                                                                                                                |          |                                                                               |   |   |   |   |   |   |   |   |   |   |   |   |   |    |                                                                                                                                                                                                                                                             |                    |        |                            |        |         |       |     |
| 5                                    | 4                                                                                                                                                                                                       |                                                                                                                                                                                                                                                                                                                                                                                |          |                                                                               |   |   |   |   |   |   |   |   |   |   |   |   |   |    |                                                                                                                                                                                                                                                             |                    |        |                            |        |         |       |     |
| 6                                    | 6                                                                                                                                                                                                       |                                                                                                                                                                                                                                                                                                                                                                                |          |                                                                               |   |   |   |   |   |   |   |   |   |   |   |   |   |    |                                                                                                                                                                                                                                                             |                    |        |                            |        |         |       |     |
| 7                                    | 12                                                                                                                                                                                                      |                                                                                                                                                                                                                                                                                                                                                                                |          |                                                                               |   |   |   |   |   |   |   |   |   |   |   |   |   |    |                                                                                                                                                                                                                                                             |                    |        |                            |        |         |       |     |
| Include as defined                   | 79.2 %                                                                                                                                                                                                  |                                                                                                                                                                                                                                                                                                                                                                                |          |                                                                               |   |   |   |   |   |   |   |   |   |   |   |   |   |    |                                                                                                                                                                                                                                                             |                    |        |                            |        |         |       |     |
| Include modified indicator           | 12.5 %                                                                                                                                                                                                  |                                                                                                                                                                                                                                                                                                                                                                                |          |                                                                               |   |   |   |   |   |   |   |   |   |   |   |   |   |    |                                                                                                                                                                                                                                                             |                    |        |                            |        |         |       |     |
| Exclude                              | 8.3 %                                                                                                                                                                                                   |                                                                                                                                                                                                                                                                                                                                                                                |          |                                                                               |   |   |   |   |   |   |   |   |   |   |   |   |   |    |                                                                                                                                                                                                                                                             |                    |        |                            |        |         |       |     |

| <p><b>17. PrEP awareness</b></p> <p>Via surveys - research</p>                                  | <p>The number of people who report being aware of the existence of PrEP as an HIV prevention option, regardless of whether or not it is available to them.</p> | <table border="1"> <caption>Data for PrEP Awareness Chart</caption> <thead> <tr> <th>Rating</th> <th>Count</th> </tr> </thead> <tbody> <tr><td>1</td><td>0</td></tr> <tr><td>2</td><td>0</td></tr> <tr><td>3</td><td>0</td></tr> <tr><td>4</td><td>4</td></tr> <tr><td>5</td><td>6</td></tr> <tr><td>6</td><td>7</td></tr> <tr><td>7</td><td>11</td></tr> </tbody> </table>              | Rating | Count | 1 | 0 | 2 | 0 | 3 | 0 | 4 | 4 | 5 | 6 | 6 | 7  | 7 | 11 | <table border="1"> <tr> <td>Include as defined</td> <td>22.7 %</td> </tr> <tr> <td>Include modified indicator</td> <td>18.2 %</td> </tr> <tr> <td>Exclude</td> <td>59.1 %</td> </tr> </table> <p>Outcome: indicator retained as optional indicator given outside routine surveillance (e.g. need for special surveys).</p> | Include as defined | 22.7 % | Include modified indicator | 18.2 % | Exclude | 59.1 % | <p>N/A</p> |
|-------------------------------------------------------------------------------------------------|----------------------------------------------------------------------------------------------------------------------------------------------------------------|------------------------------------------------------------------------------------------------------------------------------------------------------------------------------------------------------------------------------------------------------------------------------------------------------------------------------------------------------------------------------------------|--------|-------|---|---|---|---|---|---|---|---|---|---|---|----|---|----|----------------------------------------------------------------------------------------------------------------------------------------------------------------------------------------------------------------------------------------------------------------------------------------------------------------------------|--------------------|--------|----------------------------|--------|---------|--------|------------|
| Rating                                                                                          | Count                                                                                                                                                          |                                                                                                                                                                                                                                                                                                                                                                                          |        |       |   |   |   |   |   |   |   |   |   |   |   |    |   |    |                                                                                                                                                                                                                                                                                                                            |                    |        |                            |        |         |        |            |
| 1                                                                                               | 0                                                                                                                                                              |                                                                                                                                                                                                                                                                                                                                                                                          |        |       |   |   |   |   |   |   |   |   |   |   |   |    |   |    |                                                                                                                                                                                                                                                                                                                            |                    |        |                            |        |         |        |            |
| 2                                                                                               | 0                                                                                                                                                              |                                                                                                                                                                                                                                                                                                                                                                                          |        |       |   |   |   |   |   |   |   |   |   |   |   |    |   |    |                                                                                                                                                                                                                                                                                                                            |                    |        |                            |        |         |        |            |
| 3                                                                                               | 0                                                                                                                                                              |                                                                                                                                                                                                                                                                                                                                                                                          |        |       |   |   |   |   |   |   |   |   |   |   |   |    |   |    |                                                                                                                                                                                                                                                                                                                            |                    |        |                            |        |         |        |            |
| 4                                                                                               | 4                                                                                                                                                              |                                                                                                                                                                                                                                                                                                                                                                                          |        |       |   |   |   |   |   |   |   |   |   |   |   |    |   |    |                                                                                                                                                                                                                                                                                                                            |                    |        |                            |        |         |        |            |
| 5                                                                                               | 6                                                                                                                                                              |                                                                                                                                                                                                                                                                                                                                                                                          |        |       |   |   |   |   |   |   |   |   |   |   |   |    |   |    |                                                                                                                                                                                                                                                                                                                            |                    |        |                            |        |         |        |            |
| 6                                                                                               | 7                                                                                                                                                              |                                                                                                                                                                                                                                                                                                                                                                                          |        |       |   |   |   |   |   |   |   |   |   |   |   |    |   |    |                                                                                                                                                                                                                                                                                                                            |                    |        |                            |        |         |        |            |
| 7                                                                                               | 11                                                                                                                                                             |                                                                                                                                                                                                                                                                                                                                                                                          |        |       |   |   |   |   |   |   |   |   |   |   |   |    |   |    |                                                                                                                                                                                                                                                                                                                            |                    |        |                            |        |         |        |            |
| Include as defined                                                                              | 22.7 %                                                                                                                                                         |                                                                                                                                                                                                                                                                                                                                                                                          |        |       |   |   |   |   |   |   |   |   |   |   |   |    |   |    |                                                                                                                                                                                                                                                                                                                            |                    |        |                            |        |         |        |            |
| Include modified indicator                                                                      | 18.2 %                                                                                                                                                         |                                                                                                                                                                                                                                                                                                                                                                                          |        |       |   |   |   |   |   |   |   |   |   |   |   |    |   |    |                                                                                                                                                                                                                                                                                                                            |                    |        |                            |        |         |        |            |
| Exclude                                                                                         | 59.1 %                                                                                                                                                         |                                                                                                                                                                                                                                                                                                                                                                                          |        |       |   |   |   |   |   |   |   |   |   |   |   |    |   |    |                                                                                                                                                                                                                                                                                                                            |                    |        |                            |        |         |        |            |
| <p><b>18. Willingness to use PrEP</b></p> <p>Via surveys - research</p>                         | <p>The number of people who report being willing to use PrEP if it were offered/available to them.</p>                                                         | <table border="1"> <caption>Data for Willingness to Use PrEP Chart</caption> <thead> <tr> <th>Rating</th> <th>Count</th> </tr> </thead> <tbody> <tr><td>1</td><td>0</td></tr> <tr><td>2</td><td>0</td></tr> <tr><td>3</td><td>0</td></tr> <tr><td>4</td><td>3</td></tr> <tr><td>5</td><td>7</td></tr> <tr><td>6</td><td>10</td></tr> <tr><td>7</td><td>8</td></tr> </tbody> </table>     | Rating | Count | 1 | 0 | 2 | 0 | 3 | 0 | 4 | 3 | 5 | 7 | 6 | 10 | 7 | 8  | <table border="1"> <tr> <td>Include as defined</td> <td>18.2 %</td> </tr> <tr> <td>Include modified indicator</td> <td>18.2 %</td> </tr> <tr> <td>Exclude</td> <td>63.6 %</td> </tr> </table> <p>Outcome: indicator retained as optional indicator given outside routine surveillance (e.g. need for special surveys).</p> | Include as defined | 18.2 % | Include modified indicator | 18.2 % | Exclude | 63.6 % | <p>N/A</p> |
| Rating                                                                                          | Count                                                                                                                                                          |                                                                                                                                                                                                                                                                                                                                                                                          |        |       |   |   |   |   |   |   |   |   |   |   |   |    |   |    |                                                                                                                                                                                                                                                                                                                            |                    |        |                            |        |         |        |            |
| 1                                                                                               | 0                                                                                                                                                              |                                                                                                                                                                                                                                                                                                                                                                                          |        |       |   |   |   |   |   |   |   |   |   |   |   |    |   |    |                                                                                                                                                                                                                                                                                                                            |                    |        |                            |        |         |        |            |
| 2                                                                                               | 0                                                                                                                                                              |                                                                                                                                                                                                                                                                                                                                                                                          |        |       |   |   |   |   |   |   |   |   |   |   |   |    |   |    |                                                                                                                                                                                                                                                                                                                            |                    |        |                            |        |         |        |            |
| 3                                                                                               | 0                                                                                                                                                              |                                                                                                                                                                                                                                                                                                                                                                                          |        |       |   |   |   |   |   |   |   |   |   |   |   |    |   |    |                                                                                                                                                                                                                                                                                                                            |                    |        |                            |        |         |        |            |
| 4                                                                                               | 3                                                                                                                                                              |                                                                                                                                                                                                                                                                                                                                                                                          |        |       |   |   |   |   |   |   |   |   |   |   |   |    |   |    |                                                                                                                                                                                                                                                                                                                            |                    |        |                            |        |         |        |            |
| 5                                                                                               | 7                                                                                                                                                              |                                                                                                                                                                                                                                                                                                                                                                                          |        |       |   |   |   |   |   |   |   |   |   |   |   |    |   |    |                                                                                                                                                                                                                                                                                                                            |                    |        |                            |        |         |        |            |
| 6                                                                                               | 10                                                                                                                                                             |                                                                                                                                                                                                                                                                                                                                                                                          |        |       |   |   |   |   |   |   |   |   |   |   |   |    |   |    |                                                                                                                                                                                                                                                                                                                            |                    |        |                            |        |         |        |            |
| 7                                                                                               | 8                                                                                                                                                              |                                                                                                                                                                                                                                                                                                                                                                                          |        |       |   |   |   |   |   |   |   |   |   |   |   |    |   |    |                                                                                                                                                                                                                                                                                                                            |                    |        |                            |        |         |        |            |
| Include as defined                                                                              | 18.2 %                                                                                                                                                         |                                                                                                                                                                                                                                                                                                                                                                                          |        |       |   |   |   |   |   |   |   |   |   |   |   |    |   |    |                                                                                                                                                                                                                                                                                                                            |                    |        |                            |        |         |        |            |
| Include modified indicator                                                                      | 18.2 %                                                                                                                                                         |                                                                                                                                                                                                                                                                                                                                                                                          |        |       |   |   |   |   |   |   |   |   |   |   |   |    |   |    |                                                                                                                                                                                                                                                                                                                            |                    |        |                            |        |         |        |            |
| Exclude                                                                                         | 63.6 %                                                                                                                                                         |                                                                                                                                                                                                                                                                                                                                                                                          |        |       |   |   |   |   |   |   |   |   |   |   |   |    |   |    |                                                                                                                                                                                                                                                                                                                            |                    |        |                            |        |         |        |            |
| <p><b>19. Discussed PrEP with provider</b></p> <p>Via surveys – research (or facility data)</p> | <p>The proportion of PrEP-eligible people that discussed PrEP with a provider, e.g. requested or received information on PrEP.</p>                             | <table border="1"> <caption>Data for Discussed PrEP with Provider Chart</caption> <thead> <tr> <th>Rating</th> <th>Count</th> </tr> </thead> <tbody> <tr><td>1</td><td>1</td></tr> <tr><td>2</td><td>4</td></tr> <tr><td>3</td><td>3</td></tr> <tr><td>4</td><td>6</td></tr> <tr><td>5</td><td>1</td></tr> <tr><td>6</td><td>5</td></tr> <tr><td>7</td><td>7</td></tr> </tbody> </table> | Rating | Count | 1 | 1 | 2 | 4 | 3 | 3 | 4 | 6 | 5 | 1 | 6 | 5  | 7 | 7  | <table border="1"> <tr> <td>Include as defined</td> <td>9.5 %</td> </tr> <tr> <td>Include modified indicator</td> <td>9.5 %</td> </tr> <tr> <td>Exclude</td> <td>81.0 %</td> </tr> </table> <p>Outcome: excluded as separate indicator due to lack of relevance and feasibility.</p>                                       | Include as defined | 9.5 %  | Include modified indicator | 9.5 %  | Exclude | 81.0 % | <p>N/A</p> |
| Rating                                                                                          | Count                                                                                                                                                          |                                                                                                                                                                                                                                                                                                                                                                                          |        |       |   |   |   |   |   |   |   |   |   |   |   |    |   |    |                                                                                                                                                                                                                                                                                                                            |                    |        |                            |        |         |        |            |
| 1                                                                                               | 1                                                                                                                                                              |                                                                                                                                                                                                                                                                                                                                                                                          |        |       |   |   |   |   |   |   |   |   |   |   |   |    |   |    |                                                                                                                                                                                                                                                                                                                            |                    |        |                            |        |         |        |            |
| 2                                                                                               | 4                                                                                                                                                              |                                                                                                                                                                                                                                                                                                                                                                                          |        |       |   |   |   |   |   |   |   |   |   |   |   |    |   |    |                                                                                                                                                                                                                                                                                                                            |                    |        |                            |        |         |        |            |
| 3                                                                                               | 3                                                                                                                                                              |                                                                                                                                                                                                                                                                                                                                                                                          |        |       |   |   |   |   |   |   |   |   |   |   |   |    |   |    |                                                                                                                                                                                                                                                                                                                            |                    |        |                            |        |         |        |            |
| 4                                                                                               | 6                                                                                                                                                              |                                                                                                                                                                                                                                                                                                                                                                                          |        |       |   |   |   |   |   |   |   |   |   |   |   |    |   |    |                                                                                                                                                                                                                                                                                                                            |                    |        |                            |        |         |        |            |
| 5                                                                                               | 1                                                                                                                                                              |                                                                                                                                                                                                                                                                                                                                                                                          |        |       |   |   |   |   |   |   |   |   |   |   |   |    |   |    |                                                                                                                                                                                                                                                                                                                            |                    |        |                            |        |         |        |            |
| 6                                                                                               | 5                                                                                                                                                              |                                                                                                                                                                                                                                                                                                                                                                                          |        |       |   |   |   |   |   |   |   |   |   |   |   |    |   |    |                                                                                                                                                                                                                                                                                                                            |                    |        |                            |        |         |        |            |
| 7                                                                                               | 7                                                                                                                                                              |                                                                                                                                                                                                                                                                                                                                                                                          |        |       |   |   |   |   |   |   |   |   |   |   |   |    |   |    |                                                                                                                                                                                                                                                                                                                            |                    |        |                            |        |         |        |            |
| Include as defined                                                                              | 9.5 %                                                                                                                                                          |                                                                                                                                                                                                                                                                                                                                                                                          |        |       |   |   |   |   |   |   |   |   |   |   |   |    |   |    |                                                                                                                                                                                                                                                                                                                            |                    |        |                            |        |         |        |            |
| Include modified indicator                                                                      | 9.5 %                                                                                                                                                          |                                                                                                                                                                                                                                                                                                                                                                                          |        |       |   |   |   |   |   |   |   |   |   |   |   |    |   |    |                                                                                                                                                                                                                                                                                                                            |                    |        |                            |        |         |        |            |
| Exclude                                                                                         | 81.0 %                                                                                                                                                         |                                                                                                                                                                                                                                                                                                                                                                                          |        |       |   |   |   |   |   |   |   |   |   |   |   |    |   |    |                                                                                                                                                                                                                                                                                                                            |                    |        |                            |        |         |        |            |

| <p><b>20. Eligibility</b></p> | <p>The number of people that are (estimated to be) eligible for PrEP, according to local PrEP eligibility criteria.</p> | 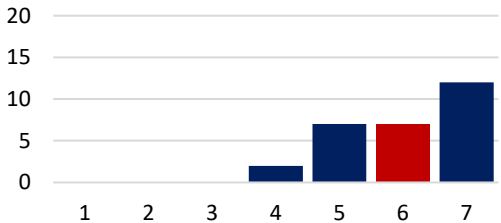 <table border="1"> <caption>Estimated data for Eligibility Bar Chart</caption> <thead> <tr> <th>Category</th> <th>Number of People</th> </tr> </thead> <tbody> <tr><td>1</td><td>0</td></tr> <tr><td>2</td><td>0</td></tr> <tr><td>3</td><td>0</td></tr> <tr><td>4</td><td>2</td></tr> <tr><td>5</td><td>7</td></tr> <tr><td>6</td><td>7</td></tr> <tr><td>7</td><td>12</td></tr> </tbody> </table> | Category | Number of People | 1 | 0 | 2 | 0 | 3 | 0 | 4 | 2 | 5 | 7 | 6 | 7 | 7 | 12 | <table border="1"> <tr> <td>Include as defined</td> <td>15.8 %</td> </tr> <tr> <td>Include modified* indicator</td> <td>52.6 %</td> </tr> <tr> <td>Exclude</td> <td>31.6 %</td> </tr> </table> <p>*Devise a (nationally relevant) algorithm or proxy to predict the size of the PrEP-eligible population based on data of – among other possible predictors- STI incidence and HIV incidence.</p> <p>Outcome: excluded as separate indicator; integrated in denominator of "PrEP coverage" indicator.</p> | Include as defined | 15.8 % | Include modified* indicator | 52.6 % | Exclude | 31.6 % | <p>N/A</p> |
|-------------------------------|-------------------------------------------------------------------------------------------------------------------------|----------------------------------------------------------------------------------------------------------------------------------------------------------------------------------------------------------------------------------------------------------------------------------------------------------------------------------------------------------------------------------------------------------------------------------------------------------------------------------------|----------|------------------|---|---|---|---|---|---|---|---|---|---|---|---|---|----|-----------------------------------------------------------------------------------------------------------------------------------------------------------------------------------------------------------------------------------------------------------------------------------------------------------------------------------------------------------------------------------------------------------------------------------------------------------------------------------------------------------|--------------------|--------|-----------------------------|--------|---------|--------|------------|
| Category                      | Number of People                                                                                                        |                                                                                                                                                                                                                                                                                                                                                                                                                                                                                        |          |                  |   |   |   |   |   |   |   |   |   |   |   |   |   |    |                                                                                                                                                                                                                                                                                                                                                                                                                                                                                                           |                    |        |                             |        |         |        |            |
| 1                             | 0                                                                                                                       |                                                                                                                                                                                                                                                                                                                                                                                                                                                                                        |          |                  |   |   |   |   |   |   |   |   |   |   |   |   |   |    |                                                                                                                                                                                                                                                                                                                                                                                                                                                                                                           |                    |        |                             |        |         |        |            |
| 2                             | 0                                                                                                                       |                                                                                                                                                                                                                                                                                                                                                                                                                                                                                        |          |                  |   |   |   |   |   |   |   |   |   |   |   |   |   |    |                                                                                                                                                                                                                                                                                                                                                                                                                                                                                                           |                    |        |                             |        |         |        |            |
| 3                             | 0                                                                                                                       |                                                                                                                                                                                                                                                                                                                                                                                                                                                                                        |          |                  |   |   |   |   |   |   |   |   |   |   |   |   |   |    |                                                                                                                                                                                                                                                                                                                                                                                                                                                                                                           |                    |        |                             |        |         |        |            |
| 4                             | 2                                                                                                                       |                                                                                                                                                                                                                                                                                                                                                                                                                                                                                        |          |                  |   |   |   |   |   |   |   |   |   |   |   |   |   |    |                                                                                                                                                                                                                                                                                                                                                                                                                                                                                                           |                    |        |                             |        |         |        |            |
| 5                             | 7                                                                                                                       |                                                                                                                                                                                                                                                                                                                                                                                                                                                                                        |          |                  |   |   |   |   |   |   |   |   |   |   |   |   |   |    |                                                                                                                                                                                                                                                                                                                                                                                                                                                                                                           |                    |        |                             |        |         |        |            |
| 6                             | 7                                                                                                                       |                                                                                                                                                                                                                                                                                                                                                                                                                                                                                        |          |                  |   |   |   |   |   |   |   |   |   |   |   |   |   |    |                                                                                                                                                                                                                                                                                                                                                                                                                                                                                                           |                    |        |                             |        |         |        |            |
| 7                             | 12                                                                                                                      |                                                                                                                                                                                                                                                                                                                                                                                                                                                                                        |          |                  |   |   |   |   |   |   |   |   |   |   |   |   |   |    |                                                                                                                                                                                                                                                                                                                                                                                                                                                                                                           |                    |        |                             |        |         |        |            |
| Include as defined            | 15.8 %                                                                                                                  |                                                                                                                                                                                                                                                                                                                                                                                                                                                                                        |          |                  |   |   |   |   |   |   |   |   |   |   |   |   |   |    |                                                                                                                                                                                                                                                                                                                                                                                                                                                                                                           |                    |        |                             |        |         |        |            |
| Include modified* indicator   | 52.6 %                                                                                                                  |                                                                                                                                                                                                                                                                                                                                                                                                                                                                                        |          |                  |   |   |   |   |   |   |   |   |   |   |   |   |   |    |                                                                                                                                                                                                                                                                                                                                                                                                                                                                                                           |                    |        |                             |        |         |        |            |
| Exclude                       | 31.6 %                                                                                                                  |                                                                                                                                                                                                                                                                                                                                                                                                                                                                                        |          |                  |   |   |   |   |   |   |   |   |   |   |   |   |   |    |                                                                                                                                                                                                                                                                                                                                                                                                                                                                                                           |                    |        |                             |        |         |        |            |

| <p><b>21. Profile of current PrEP users</b></p>                 | <p>The number of people who used PrEP <b>at least once</b> during the reporting period (e.g. last 12 months), disaggregated by some key characteristics of these users.</p> <p>Disaggregations: sex, age, key population (MSM, transgender persons, PWID, sex workers, prisoners), nationality, country of birth, socio-economic status, place of residence (geographical location).</p> | 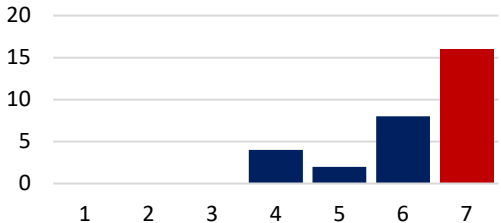 <table border="1"> <caption>Estimated data for Profile of current PrEP users Bar Chart</caption> <thead> <tr> <th>Category</th> <th>Number of People</th> </tr> </thead> <tbody> <tr><td>1</td><td>0</td></tr> <tr><td>2</td><td>0</td></tr> <tr><td>3</td><td>0</td></tr> <tr><td>4</td><td>4</td></tr> <tr><td>5</td><td>2</td></tr> <tr><td>6</td><td>8</td></tr> <tr><td>7</td><td>16</td></tr> </tbody> </table> | Category | Number of People | 1 | 0 | 2 | 0 | 3 | 0 | 4 | 4 | 5 | 2 | 6 | 8 | 7 | 16 | <table border="1"> <thead> <tr> <th colspan="3">Sex at birth</th> </tr> </thead> <tbody> <tr> <td rowspan="3">N/A</td> <td>Include as defined</td> <td>52.4 %</td> </tr> <tr> <td>Include modified* indicator</td> <td>47.6 %</td> </tr> <tr> <td>Exclude</td> <td>0.0 %</td> </tr> <tr> <td colspan="3">*Sex at birth <u>AND</u> gender identity (m/f/non-binary/other)</td> </tr> <tr> <td colspan="3">Outcome: retained as core disaggregator.</td> </tr> <tr> <th colspan="3">Age</th> </tr> <tr> <td rowspan="3">N/A</td> <td>Include as defined</td> <td>95.2 %</td> </tr> <tr> <td>Include modified indicator</td> <td>0.0 %</td> </tr> <tr> <td>Exclude</td> <td>4.8 %</td> </tr> <tr> <td colspan="3">Outcome: retained as core disaggregator.</td> </tr> </tbody> </table> |  | Sex at birth |  |  | N/A | Include as defined | 52.4 % | Include modified* indicator | 47.6 % | Exclude | 0.0 % | *Sex at birth <u>AND</u> gender identity (m/f/non-binary/other) |  |  | Outcome: retained as core disaggregator. |  |  | Age |  |  | N/A | Include as defined | 95.2 % | Include modified indicator | 0.0 % | Exclude | 4.8 % | Outcome: retained as core disaggregator. |  |  |
|-----------------------------------------------------------------|------------------------------------------------------------------------------------------------------------------------------------------------------------------------------------------------------------------------------------------------------------------------------------------------------------------------------------------------------------------------------------------|----------------------------------------------------------------------------------------------------------------------------------------------------------------------------------------------------------------------------------------------------------------------------------------------------------------------------------------------------------------------------------------------------------------------------------------------------------------------------------------------------------|----------|------------------|---|---|---|---|---|---|---|---|---|---|---|---|---|----|--------------------------------------------------------------------------------------------------------------------------------------------------------------------------------------------------------------------------------------------------------------------------------------------------------------------------------------------------------------------------------------------------------------------------------------------------------------------------------------------------------------------------------------------------------------------------------------------------------------------------------------------------------------------------------------------------------------------------------------------------------------------------------------|--|--------------|--|--|-----|--------------------|--------|-----------------------------|--------|---------|-------|-----------------------------------------------------------------|--|--|------------------------------------------|--|--|-----|--|--|-----|--------------------|--------|----------------------------|-------|---------|-------|------------------------------------------|--|--|
| Category                                                        | Number of People                                                                                                                                                                                                                                                                                                                                                                         |                                                                                                                                                                                                                                                                                                                                                                                                                                                                                                          |          |                  |   |   |   |   |   |   |   |   |   |   |   |   |   |    |                                                                                                                                                                                                                                                                                                                                                                                                                                                                                                                                                                                                                                                                                                                                                                                      |  |              |  |  |     |                    |        |                             |        |         |       |                                                                 |  |  |                                          |  |  |     |  |  |     |                    |        |                            |       |         |       |                                          |  |  |
| 1                                                               | 0                                                                                                                                                                                                                                                                                                                                                                                        |                                                                                                                                                                                                                                                                                                                                                                                                                                                                                                          |          |                  |   |   |   |   |   |   |   |   |   |   |   |   |   |    |                                                                                                                                                                                                                                                                                                                                                                                                                                                                                                                                                                                                                                                                                                                                                                                      |  |              |  |  |     |                    |        |                             |        |         |       |                                                                 |  |  |                                          |  |  |     |  |  |     |                    |        |                            |       |         |       |                                          |  |  |
| 2                                                               | 0                                                                                                                                                                                                                                                                                                                                                                                        |                                                                                                                                                                                                                                                                                                                                                                                                                                                                                                          |          |                  |   |   |   |   |   |   |   |   |   |   |   |   |   |    |                                                                                                                                                                                                                                                                                                                                                                                                                                                                                                                                                                                                                                                                                                                                                                                      |  |              |  |  |     |                    |        |                             |        |         |       |                                                                 |  |  |                                          |  |  |     |  |  |     |                    |        |                            |       |         |       |                                          |  |  |
| 3                                                               | 0                                                                                                                                                                                                                                                                                                                                                                                        |                                                                                                                                                                                                                                                                                                                                                                                                                                                                                                          |          |                  |   |   |   |   |   |   |   |   |   |   |   |   |   |    |                                                                                                                                                                                                                                                                                                                                                                                                                                                                                                                                                                                                                                                                                                                                                                                      |  |              |  |  |     |                    |        |                             |        |         |       |                                                                 |  |  |                                          |  |  |     |  |  |     |                    |        |                            |       |         |       |                                          |  |  |
| 4                                                               | 4                                                                                                                                                                                                                                                                                                                                                                                        |                                                                                                                                                                                                                                                                                                                                                                                                                                                                                                          |          |                  |   |   |   |   |   |   |   |   |   |   |   |   |   |    |                                                                                                                                                                                                                                                                                                                                                                                                                                                                                                                                                                                                                                                                                                                                                                                      |  |              |  |  |     |                    |        |                             |        |         |       |                                                                 |  |  |                                          |  |  |     |  |  |     |                    |        |                            |       |         |       |                                          |  |  |
| 5                                                               | 2                                                                                                                                                                                                                                                                                                                                                                                        |                                                                                                                                                                                                                                                                                                                                                                                                                                                                                                          |          |                  |   |   |   |   |   |   |   |   |   |   |   |   |   |    |                                                                                                                                                                                                                                                                                                                                                                                                                                                                                                                                                                                                                                                                                                                                                                                      |  |              |  |  |     |                    |        |                             |        |         |       |                                                                 |  |  |                                          |  |  |     |  |  |     |                    |        |                            |       |         |       |                                          |  |  |
| 6                                                               | 8                                                                                                                                                                                                                                                                                                                                                                                        |                                                                                                                                                                                                                                                                                                                                                                                                                                                                                                          |          |                  |   |   |   |   |   |   |   |   |   |   |   |   |   |    |                                                                                                                                                                                                                                                                                                                                                                                                                                                                                                                                                                                                                                                                                                                                                                                      |  |              |  |  |     |                    |        |                             |        |         |       |                                                                 |  |  |                                          |  |  |     |  |  |     |                    |        |                            |       |         |       |                                          |  |  |
| 7                                                               | 16                                                                                                                                                                                                                                                                                                                                                                                       |                                                                                                                                                                                                                                                                                                                                                                                                                                                                                                          |          |                  |   |   |   |   |   |   |   |   |   |   |   |   |   |    |                                                                                                                                                                                                                                                                                                                                                                                                                                                                                                                                                                                                                                                                                                                                                                                      |  |              |  |  |     |                    |        |                             |        |         |       |                                                                 |  |  |                                          |  |  |     |  |  |     |                    |        |                            |       |         |       |                                          |  |  |
| Sex at birth                                                    |                                                                                                                                                                                                                                                                                                                                                                                          |                                                                                                                                                                                                                                                                                                                                                                                                                                                                                                          |          |                  |   |   |   |   |   |   |   |   |   |   |   |   |   |    |                                                                                                                                                                                                                                                                                                                                                                                                                                                                                                                                                                                                                                                                                                                                                                                      |  |              |  |  |     |                    |        |                             |        |         |       |                                                                 |  |  |                                          |  |  |     |  |  |     |                    |        |                            |       |         |       |                                          |  |  |
| N/A                                                             | Include as defined                                                                                                                                                                                                                                                                                                                                                                       | 52.4 %                                                                                                                                                                                                                                                                                                                                                                                                                                                                                                   |          |                  |   |   |   |   |   |   |   |   |   |   |   |   |   |    |                                                                                                                                                                                                                                                                                                                                                                                                                                                                                                                                                                                                                                                                                                                                                                                      |  |              |  |  |     |                    |        |                             |        |         |       |                                                                 |  |  |                                          |  |  |     |  |  |     |                    |        |                            |       |         |       |                                          |  |  |
|                                                                 | Include modified* indicator                                                                                                                                                                                                                                                                                                                                                              | 47.6 %                                                                                                                                                                                                                                                                                                                                                                                                                                                                                                   |          |                  |   |   |   |   |   |   |   |   |   |   |   |   |   |    |                                                                                                                                                                                                                                                                                                                                                                                                                                                                                                                                                                                                                                                                                                                                                                                      |  |              |  |  |     |                    |        |                             |        |         |       |                                                                 |  |  |                                          |  |  |     |  |  |     |                    |        |                            |       |         |       |                                          |  |  |
|                                                                 | Exclude                                                                                                                                                                                                                                                                                                                                                                                  | 0.0 %                                                                                                                                                                                                                                                                                                                                                                                                                                                                                                    |          |                  |   |   |   |   |   |   |   |   |   |   |   |   |   |    |                                                                                                                                                                                                                                                                                                                                                                                                                                                                                                                                                                                                                                                                                                                                                                                      |  |              |  |  |     |                    |        |                             |        |         |       |                                                                 |  |  |                                          |  |  |     |  |  |     |                    |        |                            |       |         |       |                                          |  |  |
| *Sex at birth <u>AND</u> gender identity (m/f/non-binary/other) |                                                                                                                                                                                                                                                                                                                                                                                          |                                                                                                                                                                                                                                                                                                                                                                                                                                                                                                          |          |                  |   |   |   |   |   |   |   |   |   |   |   |   |   |    |                                                                                                                                                                                                                                                                                                                                                                                                                                                                                                                                                                                                                                                                                                                                                                                      |  |              |  |  |     |                    |        |                             |        |         |       |                                                                 |  |  |                                          |  |  |     |  |  |     |                    |        |                            |       |         |       |                                          |  |  |
| Outcome: retained as core disaggregator.                        |                                                                                                                                                                                                                                                                                                                                                                                          |                                                                                                                                                                                                                                                                                                                                                                                                                                                                                                          |          |                  |   |   |   |   |   |   |   |   |   |   |   |   |   |    |                                                                                                                                                                                                                                                                                                                                                                                                                                                                                                                                                                                                                                                                                                                                                                                      |  |              |  |  |     |                    |        |                             |        |         |       |                                                                 |  |  |                                          |  |  |     |  |  |     |                    |        |                            |       |         |       |                                          |  |  |
| Age                                                             |                                                                                                                                                                                                                                                                                                                                                                                          |                                                                                                                                                                                                                                                                                                                                                                                                                                                                                                          |          |                  |   |   |   |   |   |   |   |   |   |   |   |   |   |    |                                                                                                                                                                                                                                                                                                                                                                                                                                                                                                                                                                                                                                                                                                                                                                                      |  |              |  |  |     |                    |        |                             |        |         |       |                                                                 |  |  |                                          |  |  |     |  |  |     |                    |        |                            |       |         |       |                                          |  |  |
| N/A                                                             | Include as defined                                                                                                                                                                                                                                                                                                                                                                       | 95.2 %                                                                                                                                                                                                                                                                                                                                                                                                                                                                                                   |          |                  |   |   |   |   |   |   |   |   |   |   |   |   |   |    |                                                                                                                                                                                                                                                                                                                                                                                                                                                                                                                                                                                                                                                                                                                                                                                      |  |              |  |  |     |                    |        |                             |        |         |       |                                                                 |  |  |                                          |  |  |     |  |  |     |                    |        |                            |       |         |       |                                          |  |  |
|                                                                 | Include modified indicator                                                                                                                                                                                                                                                                                                                                                               | 0.0 %                                                                                                                                                                                                                                                                                                                                                                                                                                                                                                    |          |                  |   |   |   |   |   |   |   |   |   |   |   |   |   |    |                                                                                                                                                                                                                                                                                                                                                                                                                                                                                                                                                                                                                                                                                                                                                                                      |  |              |  |  |     |                    |        |                             |        |         |       |                                                                 |  |  |                                          |  |  |     |  |  |     |                    |        |                            |       |         |       |                                          |  |  |
|                                                                 | Exclude                                                                                                                                                                                                                                                                                                                                                                                  | 4.8 %                                                                                                                                                                                                                                                                                                                                                                                                                                                                                                    |          |                  |   |   |   |   |   |   |   |   |   |   |   |   |   |    |                                                                                                                                                                                                                                                                                                                                                                                                                                                                                                                                                                                                                                                                                                                                                                                      |  |              |  |  |     |                    |        |                             |        |         |       |                                                                 |  |  |                                          |  |  |     |  |  |     |                    |        |                            |       |         |       |                                          |  |  |
| Outcome: retained as core disaggregator.                        |                                                                                                                                                                                                                                                                                                                                                                                          |                                                                                                                                                                                                                                                                                                                                                                                                                                                                                                          |          |                  |   |   |   |   |   |   |   |   |   |   |   |   |   |    |                                                                                                                                                                                                                                                                                                                                                                                                                                                                                                                                                                                                                                                                                                                                                                                      |  |              |  |  |     |                    |        |                             |        |         |       |                                                                 |  |  |                                          |  |  |     |  |  |     |                    |        |                            |       |         |       |                                          |  |  |

*Profile of current PrEP users, continued...*

| Belonging to the KP of MSM                            |                                                                                                                                                                                                                                                             |        |
|-------------------------------------------------------|-------------------------------------------------------------------------------------------------------------------------------------------------------------------------------------------------------------------------------------------------------------|--------|
| N/A                                                   | Include as defined                                                                                                                                                                                                                                          | 85.7 % |
|                                                       | Include modified indicator                                                                                                                                                                                                                                  | 9.5%   |
|                                                       | Exclude                                                                                                                                                                                                                                                     | 4.8 %  |
|                                                       | Outcome: retained as core disaggregator.                                                                                                                                                                                                                    |        |
| Belonging to the KP of transgender people (TGP)       |                                                                                                                                                                                                                                                             |        |
| N/A                                                   | Include as defined                                                                                                                                                                                                                                          | 38.1 % |
|                                                       | Include modified* indicator                                                                                                                                                                                                                                 | 52.4 % |
|                                                       | Exclude                                                                                                                                                                                                                                                     | 9.5 %  |
|                                                       | *do not 'collect' separately, but base indicator on sex at birth and gender identity; disaggregate by transgender men and transgender women<br><br>Outcome: exclude as separate indicator; derive from combining disaggregators "gender" and "sex at birth" |        |
| Belonging to the KP of people who inject drugs (PWID) |                                                                                                                                                                                                                                                             |        |
| N/A                                                   | Include as defined                                                                                                                                                                                                                                          | 66.7 % |
|                                                       | Include modified* indicator                                                                                                                                                                                                                                 | 23.8 % |
|                                                       | Exclude                                                                                                                                                                                                                                                     | 9.5 %  |
|                                                       | *use of any drug (including chemsex)<br><br>Outcome: retain as supplementary disaggregator.                                                                                                                                                                 |        |
| Belonging to the KP of sex workers (SW)               |                                                                                                                                                                                                                                                             |        |

*Profile of current PrEP users, continued...*

|                                                      |        |                             |        |
|------------------------------------------------------|--------|-----------------------------|--------|
| N/A                                                  |        | Include as defined          | 45.0 % |
|                                                      |        | Include modified* indicator | 30.0 % |
|                                                      |        | Exclude                     | 25.0 % |
| *report PrEP use among male MSW and FSW separately   |        |                             |        |
| Outcome: retain as supplementary disaggregator.      |        |                             |        |
| Belonging to the KP of prisoners                     |        |                             |        |
| Include as defined                                   | 42.3 % | N/A                         |        |
| Include modified* indicator                          | 0.0 %  |                             |        |
| Exclude                                              | 57.7 % |                             |        |
| Outcome: retained as supplementary disaggregator.    |        |                             |        |
| Country of birth (as indicator for migration status) |        |                             |        |
| Include as defined                                   | 96.3 % | Include as defined          | 95.2 % |
| Include modified* indicator                          | 0.0 %  | Include modified* indicator | 0.0 %  |
| Exclude                                              | 3.7 %  | Exclude                     | 4.8 %  |
| Outcome: retained as core disaggregator.             |        |                             |        |
| Nationality                                          |        |                             |        |
| Include as defined                                   | 22.2 % | N/A                         |        |
| Include modified* indicator                          | 7.4 %  |                             |        |
| Exclude                                              | 70.4 % |                             |        |
| Outcome: retained as supplementary disaggregator     |        |                             |        |

|  |  |  |                                                                                                                                                    |        |
|--|--|--|----------------------------------------------------------------------------------------------------------------------------------------------------|--------|
|  |  |  | (in case country of birth not available).                                                                                                          |        |
|  |  |  | Place of residence (geographical location)                                                                                                         |        |
|  |  |  | Include as defined                                                                                                                                 | 63.0 % |
|  |  |  | Include modified* indicator                                                                                                                        | 14.8 % |
|  |  |  | Exclude                                                                                                                                            | 22.2 % |
|  |  |  | Outcome: retained as supplementary disaggregator.                                                                                                  |        |
|  |  |  | Socioeconomic status (SES)                                                                                                                         |        |
|  |  |  | Include as defined                                                                                                                                 | 12.9 % |
|  |  |  | Include modified* indicator                                                                                                                        | 67.7 % |
|  |  |  | Exclude                                                                                                                                            | 19.4 % |
|  |  |  | *Replace SES with 'highest completed education'                                                                                                    |        |
|  |  |  | Outcome: excluded as separate indicator; no single best SES disaggregator, to be judged in context which SES indicator is most relevant to report. |        |
